# Supplementary material
Source: publisher figshare collection journal article supplement (https://rs.figshare.com/ndownloader/files/20189307)
Supplement: Supplementary file 1 [file 20189307]

## Sheet: Legend
Daily Conductivity Summary
FOR: Increased summer food supply decreases nonbreeding movement in black-legged kittiwakes
AUTHORS: Shannon Whelan, Scott A. Hatch, David B. Irons, Alyson McKnight, Kyle H. Elliott
tagYear	[geolocatorID]_[yearDeployed]
DSD	days since Aug 1 of deployment year
obs	number of measurements taken that day
obsDry	number of dry measurements (conductivity = 0) taken that day
obsWet	number of wet measurements (conductivity > 0) taken that day
propDry	proportion of dry measurements for that day (number of dry measurements / total measurements)

## Sheet: Whelan et al. Daily Conductivit
	tagYear	DSD	obs	obsDry	obsWet	propDry
1	12044_2010	1	144	117	27	0.8125
2	12044_2010	2	144	106	38	0.736111
3	12044_2010	3	144	126	18	0.875
4	12044_2010	4	144	124	20	0.861111
5	12044_2010	5	144	95	49	0.659722
6	12044_2010	6	144	124	20	0.861111
7	12044_2010	7	144	72	72	0.5
8	12044_2010	8	144	78	66	0.541667
9	12044_2010	9	144	89	55	0.618056
10	12044_2010	10	144	87	57	0.604167
11	12044_2010	11	144	79	65	0.548611
12	12044_2010	12	144	85	59	0.590278
13	12044_2010	13	144	97	47	0.673611
14	12044_2010	14	144	85	59	0.590278
15	12044_2010	15	144	111	33	0.770833
16	12044_2010	16	144	67	77	0.465278
17	12044_2010	17	144	80	64	0.555556
18	12044_2010	18	144	56	88	0.388889
19	12044_2010	19	144	80	64	0.555556
20	12044_2010	20	144	76	68	0.527778
21	12044_2010	21	144	83	61	0.576389
22	12044_2010	22	144	63	81	0.4375
23	12044_2010	23	144	50	94	0.347222
24	12044_2010	24	144	46	98	0.319444
25	12044_2010	25	144	98	46	0.680556
26	12044_2010	26	144	91	53	0.631944
27	12044_2010	27	144	40	104	0.277778
28	12044_2010	28	144	113	31	0.784722
29	12044_2010	29	144	110	34	0.763889
30	12044_2010	30	144	45	99	0.3125
31	12044_2010	31	144	55	89	0.381944
32	12044_2010	32	144	56	88	0.388889
33	12044_2010	33	144	48	96	0.333333
34	12044_2010	34	144	11	133	0.0763889
35	12044_2010	35	144	11	133	0.0763889
36	12044_2010	36	144	24	120	0.166667
37	12044_2010	37	144	15	129	0.104167
38	12044_2010	38	144	51	93	0.354167
39	12044_2010	39	144	43	101	0.298611
40	12044_2010	40	144	23	121	0.159722
41	12044_2010	41	144	30	114	0.208333
42	12044_2010	42	144	21	123	0.145833
43	12044_2010	43	144	4	140	0.0277778
44	12044_2010	44	144	45	99	0.3125
45	12044_2010	45	144	21	123	0.145833
46	12044_2010	46	144	2	142	0.0138889
47	12044_2010	47	144	39	105	0.270833
48	12044_2010	48	144	55	89	0.381944
49	12044_2010	49	144	28	116	0.194444
50	12044_2010	50	144	34	110	0.236111
51	12044_2010	51	144	22	122	0.152778
52	12044_2010	52	144	24	120	0.166667
53	12044_2010	53	144	16	128	0.111111
54	12044_2010	54	144	21	123	0.145833
55	12044_2010	55	144	29	115	0.201389
56	12044_2010	56	144	10	134	0.0694444
57	12044_2010	57	144	25	119	0.173611
58	12044_2010	58	144	30	114	0.208333
59	12044_2010	59	144	9	135	0.0625
60	12044_2010	60	144	20	124	0.138889
61	12044_2010	61	144	6	138	0.0416667
62	12044_2010	62	144	1	143	0.00694444
63	12044_2010	63	144	11	133	0.0763889
64	12044_2010	64	144	39	105	0.270833
65	12044_2010	65	144	23	121	0.159722
66	12044_2010	66	144	41	103	0.284722
67	12044_2010	67	144	2	142	0.0138889
68	12044_2010	68	144	23	121	0.159722
69	12044_2010	69	144	14	130	0.0972222
70	12044_2010	70	144	10	134	0.0694444
71	12044_2010	71	144	9	135	0.0625
72	12044_2010	72	144	6	138	0.0416667
73	12044_2010	73	144	7	137	0.0486111
74	12044_2010	74	144	15	129	0.104167
75	12044_2010	75	144	10	134	0.0694444
76	12044_2010	76	144	36	108	0.25
77	12044_2010	77	144	29	115	0.201389
78	12044_2010	78	144	17	127	0.118056
79	12044_2010	79	144	17	127	0.118056
80	12044_2010	80	144	19	125	0.131944
81	12044_2010	81	144	7	137	0.0486111
82	12044_2010	82	144	41	103	0.284722
83	12044_2010	83	144	53	91	0.368056
84	12044_2010	84	144	24	120	0.166667
85	12044_2010	85	144	30	114	0.208333
86	12044_2010	86	144	32	112	0.222222
87	12044_2010	87	144	27	117	0.1875
88	12044_2010	88	144	39	105	0.270833
89	12044_2010	89	144	24	120	0.166667
90	12044_2010	90	144	8	136	0.0555556
91	12044_2010	91	144	16	128	0.111111
92	12044_2010	92	144	32	112	0.222222
93	12044_2010	93	144	19	125	0.131944
94	12044_2010	94	144	11	133	0.0763889
95	12044_2010	95	144	21	123	0.145833
96	12044_2010	96	144	15	129	0.104167
97	12044_2010	97	144	27	117	0.1875
98	12044_2010	98	144	10	134	0.0694444
99	12044_2010	99	144	25	119	0.173611
100	12044_2010	100	150	25	125	0.166667
101	12044_2010	101	144	27	117	0.1875
102	12044_2010	102	144	29	115	0.201389
103	12044_2010	103	144	14	130	0.0972222
104	12044_2010	104	144	22	122	0.152778
105	12044_2010	105	144	31	113	0.215278
106	12044_2010	106	144	16	128	0.111111
107	12044_2010	107	144	33	111	0.229167
108	12044_2010	108	144	6	138	0.0416667
109	12044_2010	109	144	42	102	0.291667
110	12044_2010	110	144	27	117	0.1875
111	12044_2010	111	144	40	104	0.277778
112	12044_2010	112	144	11	133	0.0763889
113	12044_2010	113	144	10	134	0.0694444
114	12044_2010	114	144	14	130	0.0972222
115	12044_2010	115	144	13	131	0.0902778
116	12044_2010	116	144	10	134	0.0694444
117	12044_2010	117	144	10	134	0.0694444
118	12044_2010	118	144	21	123	0.145833
119	12044_2010	119	144	24	120	0.166667
120	12044_2010	120	144	19	125	0.131944
121	12044_2010	121	144	34	110	0.236111
122	12044_2010	122	144	10	134	0.0694444
123	12044_2010	123	144	39	105	0.270833
124	12044_2010	124	144	33	111	0.229167
125	12044_2010	125	144	15	129	0.104167
126	12044_2010	126	144	26	118	0.180556
127	12044_2010	127	144	17	127	0.118056
128	12044_2010	128	144	17	127	0.118056
129	12044_2010	129	144	10	134	0.0694444
130	12044_2010	130	144	8	136	0.0555556
131	12044_2010	131	144	8	136	0.0555556
132	12044_2010	132	144	12	132	0.0833333
133	12044_2010	133	144	24	120	0.166667
134	12044_2010	134	144	6	138	0.0416667
135	12044_2010	135	144	8	136	0.0555556
136	12044_2010	136	144	22	122	0.152778
137	12044_2010	137	144	16	128	0.111111
138	12044_2010	138	144	21	123	0.145833
139	12044_2010	139	144	16	128	0.111111
140	12044_2010	140	144	43	101	0.298611
141	12044_2010	141	144	27	117	0.1875
142	12044_2010	142	144	26	118	0.180556
143	12044_2010	143	144	26	118	0.180556
144	12044_2010	144	144	22	122	0.152778
145	12044_2010	145	144	11	133	0.0763889
146	12044_2010	146	144	27	117	0.1875
147	12044_2010	147	144	26	118	0.180556
148	12044_2010	148	144	25	119	0.173611
149	12044_2010	149	144	18	126	0.125
150	12044_2010	150	144	30	114	0.208333
151	12044_2010	151	144	15	129	0.104167
152	12044_2010	152	144	29	115	0.201389
153	12044_2010	153	144	25	119	0.173611
154	12044_2010	154	144	15	129	0.104167
155	12044_2010	155	144	25	119	0.173611
156	12044_2010	156	144	27	117	0.1875
157	12044_2010	157	144	13	131	0.0902778
158	12044_2010	158	144	14	130	0.0972222
159	12044_2010	159	144	22	122	0.152778
160	12044_2010	160	144	25	119	0.173611
161	12044_2010	161	144	12	132	0.0833333
162	12044_2010	162	144	17	127	0.118056
163	12044_2010	163	144	16	128	0.111111
164	12044_2010	164	144	7	137	0.0486111
165	12044_2010	165	144	22	122	0.152778
166	12044_2010	166	144	29	115	0.201389
167	12044_2010	167	144	25	119	0.173611
168	12044_2010	168	144	28	116	0.194444
169	12044_2010	169	144	35	109	0.243056
170	12044_2010	170	144	6	138	0.0416667
171	12044_2010	171	144	11	133	0.0763889
172	12044_2010	172	144	26	118	0.180556
173	12044_2010	173	144	31	113	0.215278
174	12044_2010	174	144	20	124	0.138889
175	12044_2010	175	144	32	112	0.222222
176	12044_2010	176	144	19	125	0.131944
177	12044_2010	177	144	18	126	0.125
178	12044_2010	178	144	10	134	0.0694444
179	12044_2010	179	144	22	122	0.152778
180	12044_2010	180	144	20	124	0.138889
181	12044_2010	181	144	33	111	0.229167
182	12044_2010	182	144	25	119	0.173611
183	12044_2010	183	144	28	116	0.194444
184	12044_2010	184	144	22	122	0.152778
185	12044_2010	185	144	23	121	0.159722
186	12044_2010	186	144	21	123	0.145833
187	12044_2010	187	144	16	128	0.111111
188	12044_2010	188	144	9	135	0.0625
189	12044_2010	189	144	25	119	0.173611
190	12044_2010	190	144	18	126	0.125
191	12044_2010	191	144	21	123	0.145833
192	12044_2010	192	144	4	140	0.0277778
193	12044_2010	193	144	17	127	0.118056
194	12044_2010	194	144	25	119	0.173611
195	12044_2010	195	144	16	128	0.111111
196	12044_2010	196	144	22	122	0.152778
197	12044_2010	197	144	28	116	0.194444
198	12044_2010	198	144	27	117	0.1875
199	12044_2010	199	144	15	129	0.104167
200	12044_2010	200	144	45	99	0.3125
201	12044_2010	201	144	42	102	0.291667
202	12044_2010	202	144	26	118	0.180556
203	12044_2010	203	144	21	123	0.145833
204	12044_2010	204	144	40	104	0.277778
205	12044_2010	205	144	25	119	0.173611
206	12044_2010	206	144	28	116	0.194444
207	12044_2010	207	144	29	115	0.201389
208	12044_2010	208	144	24	120	0.166667
209	12044_2010	209	144	18	126	0.125
210	12044_2010	210	144	28	116	0.194444
211	12044_2010	211	144	39	105	0.270833
212	12044_2010	212	144	43	101	0.298611
213	12044_2010	213	144	8	136	0.0555556
214	12044_2010	214	144	46	98	0.319444
215	12044_2010	215	144	20	124	0.138889
216	12044_2010	216	144	60	84	0.416667
217	12044_2010	217	144	40	104	0.277778
218	12044_2010	218	144	27	117	0.1875
219	12044_2010	219	144	23	121	0.159722
220	12044_2010	220	144	28	116	0.194444
221	12044_2010	221	144	27	117	0.1875
222	12044_2010	222	144	24	120	0.166667
223	12044_2010	223	144	52	92	0.361111
224	12044_2010	224	144	54	90	0.375
225	12044_2010	225	144	27	117	0.1875
226	12044_2010	226	138	25	113	0.181159
227	12044_2010	227	144	33	111	0.229167
228	12044_2010	228	144	27	117	0.1875
229	12044_2010	229	144	39	105	0.270833
230	12044_2010	230	144	44	100	0.305556
231	12044_2010	231	144	49	95	0.340278
232	12044_2010	232	144	34	110	0.236111
233	12044_2010	233	144	24	120	0.166667
234	12044_2010	234	144	31	113	0.215278
235	12044_2010	235	144	19	125	0.131944
236	12044_2010	236	144	33	111	0.229167
237	12044_2010	237	144	15	129	0.104167
238	12044_2010	238	144	25	119	0.173611
239	12044_2010	239	144	33	111	0.229167
240	12044_2010	240	144	27	117	0.1875
241	12044_2010	241	144	19	125	0.131944
242	12044_2010	242	144	20	124	0.138889
243	12044_2010	243	144	38	106	0.263889
244	12044_2010	244	144	31	113	0.215278
245	12044_2010	245	144	32	112	0.222222
246	12044_2010	246	144	56	88	0.388889
247	12044_2010	247	144	52	92	0.361111
248	12044_2010	248	144	54	90	0.375
249	12044_2010	249	144	38	106	0.263889
250	12044_2010	250	144	30	114	0.208333
251	12044_2010	251	144	48	96	0.333333
252	12044_2010	252	144	55	89	0.381944
253	12044_2010	253	144	70	74	0.486111
254	12044_2010	254	144	78	66	0.541667
255	12044_2010	255	144	65	79	0.451389
256	12044_2011	1	144	88	56	0.611111
257	12044_2011	2	144	124	20	0.861111
258	12044_2011	3	144	109	35	0.756944
259	12044_2011	4	144	83	61	0.576389
260	12044_2011	5	144	85	59	0.590278
261	12044_2011	6	144	94	50	0.652778
262	12044_2011	7	144	103	41	0.715278
263	12044_2011	8	144	84	60	0.583333
264	12044_2011	9	144	93	51	0.645833
265	12044_2011	10	144	93	51	0.645833
266	12044_2011	11	144	91	53	0.631944
267	12044_2011	12	144	133	11	0.923611
268	12044_2011	13	144	123	21	0.854167
269	12044_2011	14	144	104	40	0.722222
270	12044_2011	15	144	65	79	0.451389
271	12044_2011	16	144	52	92	0.361111
272	12044_2011	17	144	60	84	0.416667
273	12044_2011	18	144	53	91	0.368056
274	12044_2011	19	144	58	86	0.402778
275	12044_2011	20	144	43	101	0.298611
276	12044_2011	21	144	42	102	0.291667
277	12044_2011	22	144	56	88	0.388889
278	12044_2011	23	144	63	81	0.4375
279	12044_2011	24	144	45	99	0.3125
280	12044_2011	25	144	58	86	0.402778
281	12044_2011	26	144	43	101	0.298611
282	12044_2011	27	144	46	98	0.319444
283	12044_2011	28	144	36	108	0.25
284	12044_2011	29	144	61	83	0.423611
285	12044_2011	30	144	41	103	0.284722
286	12044_2011	31	144	65	79	0.451389
287	12044_2011	32	144	60	84	0.416667
288	12044_2011	33	144	65	79	0.451389
289	12044_2011	34	144	42	102	0.291667
290	12044_2011	35	144	62	82	0.430556
291	12044_2011	36	144	64	80	0.444444
292	12044_2011	37	144	23	121	0.159722
293	12044_2011	38	144	7	137	0.0486111
294	12044_2011	39	144	14	130	0.0972222
295	12044_2011	40	144	37	107	0.256944
296	12044_2011	41	144	48	96	0.333333
297	12044_2011	42	144	37	107	0.256944
298	12044_2011	43	144	32	112	0.222222
299	12044_2011	44	144	21	123	0.145833
300	12044_2011	45	144	22	122	0.152778
301	12044_2011	46	144	31	113	0.215278
302	12044_2011	47	144	34	110	0.236111
303	12044_2011	48	144	16	128	0.111111
304	12044_2011	49	144	22	122	0.152778
305	12044_2011	50	144	55	89	0.381944
306	12044_2011	51	144	11	133	0.0763889
307	12044_2011	52	144	8	136	0.0555556
308	12044_2011	53	144	10	134	0.0694444
309	12044_2011	54	144	40	104	0.277778
310	12044_2011	55	144	18	126	0.125
311	12044_2011	56	144	12	132	0.0833333
312	12044_2011	57	144	18	126	0.125
313	12044_2011	58	144	16	128	0.111111
314	12044_2011	59	144	21	123	0.145833
315	12044_2011	60	144	19	125	0.131944
316	12044_2011	61	144	24	120	0.166667
317	12044_2011	62	144	37	107	0.256944
318	12044_2011	63	144	13	131	0.0902778
319	12044_2011	64	144	40	104	0.277778
320	12044_2011	65	144	24	120	0.166667
321	12044_2011	66	144	25	119	0.173611
322	12044_2011	67	144	20	124	0.138889
323	12044_2011	68	144	5	139	0.0347222
324	12044_2011	69	144	24	120	0.166667
325	12044_2011	70	144	20	124	0.138889
326	12044_2011	71	144	20	124	0.138889
327	12044_2011	72	144	27	117	0.1875
328	12044_2011	73	144	28	116	0.194444
329	12044_2011	74	144	3	141	0.0208333
330	12044_2011	75	144	3	141	0.0208333
331	12044_2011	76	144	20	124	0.138889
332	12044_2011	77	144	11	133	0.0763889
333	12044_2011	78	144	30	114	0.208333
334	12044_2011	79	144	48	96	0.333333
335	12044_2011	80	144	17	127	0.118056
336	12044_2011	81	144	32	112	0.222222
337	12044_2011	82	144	38	106	0.263889
338	12044_2011	83	144	35	109	0.243056
339	12044_2011	84	144	9	135	0.0625
340	12044_2011	85	144	5	139	0.0347222
341	12044_2011	86	144	7	137	0.0486111
342	12044_2011	87	144	7	137	0.0486111
343	12044_2011	88	144	20	124	0.138889
344	12044_2011	89	144	10	134	0.0694444
345	12044_2011	90	144	26	118	0.180556
346	12044_2011	91	144	23	121	0.159722
347	12044_2011	92	144	34	110	0.236111
348	12044_2011	93	144	24	120	0.166667
349	12044_2011	94	144	21	123	0.145833
350	12044_2011	95	144	15	129	0.104167
351	12044_2011	96	144	28	116	0.194444
352	12044_2011	97	144	25	119	0.173611
353	12044_2011	98	144	14	130	0.0972222
354	12044_2011	99	150	8	142	0.0533333
355	12044_2011	100	144	26	118	0.180556
356	12044_2011	101	144	26	118	0.180556
357	12044_2011	102	144	17	127	0.118056
358	12044_2011	103	144	19	125	0.131944
359	12044_2011	104	144	5	139	0.0347222
360	12044_2011	105	144	14	130	0.0972222
361	12044_2011	106	144	17	127	0.118056
362	12044_2011	107	144	21	123	0.145833
363	12044_2011	108	144	19	125	0.131944
364	12044_2011	109	144	30	114	0.208333
365	12044_2011	110	144	30	114	0.208333
366	12044_2011	111	144	21	123	0.145833
367	12044_2011	112	144	8	136	0.0555556
368	12044_2011	113	144	20	124	0.138889
369	12044_2011	114	144	11	133	0.0763889
370	12044_2011	115	144	7	137	0.0486111
371	12044_2011	116	144	22	122	0.152778
372	12044_2011	117	144	6	138	0.0416667
373	12044_2011	118	144	29	115	0.201389
374	12044_2011	119	144	16	128	0.111111
375	12044_2011	120	144	21	123	0.145833
376	12044_2011	121	144	20	124	0.138889
377	12044_2011	122	144	22	122	0.152778
378	12044_2011	123	144	14	130	0.0972222
379	12044_2011	124	144	24	120	0.166667
380	12044_2011	125	144	11	133	0.0763889
381	12044_2011	126	144	21	123	0.145833
382	12044_2011	127	144	15	129	0.104167
383	12044_2011	128	144	12	132	0.0833333
384	12044_2011	129	144	28	116	0.194444
385	12044_2011	130	144	2	142	0.0138889
386	12044_2011	131	144	10	134	0.0694444
387	12044_2011	132	144	16	128	0.111111
388	12044_2011	133	144	18	126	0.125
389	12044_2011	134	144	7	137	0.0486111
390	12044_2011	135	144	19	125	0.131944
391	12044_2011	136	144	17	127	0.118056
392	12044_2011	137	144	15	129	0.104167
393	12044_2011	138	144	10	134	0.0694444
394	12044_2011	139	144	4	140	0.0277778
395	12044_2011	140	144	29	115	0.201389
396	12044_2011	141	144	0	144	0
397	12044_2011	142	144	11	133	0.0763889
398	12044_2011	143	144	14	130	0.0972222
399	12044_2011	144	144	14	130	0.0972222
400	12044_2011	145	144	17	127	0.118056
401	12044_2011	146	144	16	128	0.111111
402	12044_2011	147	144	16	128	0.111111
403	12044_2011	148	144	12	132	0.0833333
404	12044_2011	149	144	22	122	0.152778
405	12044_2011	150	144	21	123	0.145833
406	12044_2011	151	144	30	114	0.208333
407	12044_2011	152	144	18	126	0.125
408	12044_2011	153	144	17	127	0.118056
409	12044_2011	154	144	16	128	0.111111
410	12044_2011	155	144	26	118	0.180556
411	12044_2011	156	144	12	132	0.0833333
412	12044_2011	157	144	16	128	0.111111
413	12044_2011	158	144	24	120	0.166667
414	12044_2011	159	144	23	121	0.159722
415	12044_2011	160	144	16	128	0.111111
416	12044_2011	161	144	3	141	0.0208333
417	12044_2011	162	144	22	122	0.152778
418	12044_2011	163	144	37	107	0.256944
419	12044_2011	164	144	26	118	0.180556
420	12044_2011	165	144	12	132	0.0833333
421	12044_2011	166	144	30	114	0.208333
422	12044_2011	167	144	38	106	0.263889
423	12044_2011	168	144	33	111	0.229167
424	12044_2011	169	144	24	120	0.166667
425	12044_2011	170	144	47	97	0.326389
426	12044_2011	171	144	22	122	0.152778
427	12044_2011	172	144	37	107	0.256944
428	12044_2011	173	144	19	125	0.131944
429	12044_2011	174	144	10	134	0.0694444
430	12044_2011	175	144	11	133	0.0763889
431	12044_2011	176	144	37	107	0.256944
432	12044_2011	177	144	27	117	0.1875
433	12044_2011	178	144	22	122	0.152778
434	12044_2011	179	144	25	119	0.173611
435	12044_2011	180	144	24	120	0.166667
436	12044_2011	181	144	58	86	0.402778
437	12044_2011	182	144	32	112	0.222222
438	12044_2011	183	144	30	114	0.208333
439	12044_2011	184	144	11	133	0.0763889
440	12044_2011	185	144	17	127	0.118056
441	12044_2011	186	144	15	129	0.104167
442	12044_2011	187	144	13	131	0.0902778
443	12044_2011	188	144	26	118	0.180556
444	12044_2011	189	144	41	103	0.284722
445	12044_2011	190	144	14	130	0.0972222
446	12044_2011	191	144	11	133	0.0763889
447	12044_2011	192	144	12	132	0.0833333
448	12044_2011	193	144	17	127	0.118056
449	12044_2011	194	144	18	126	0.125
450	12044_2011	195	144	21	123	0.145833
451	12044_2011	196	144	26	118	0.180556
452	12044_2011	197	144	34	110	0.236111
453	12044_2011	198	144	10	134	0.0694444
454	12044_2011	199	144	25	119	0.173611
455	12044_2011	200	144	14	130	0.0972222
456	12044_2011	201	144	22	122	0.152778
457	12044_2011	202	144	34	110	0.236111
458	12044_2011	203	144	35	109	0.243056
459	12044_2011	204	144	10	134	0.0694444
460	12044_2011	205	144	29	115	0.201389
461	12044_2011	206	144	31	113	0.215278
462	12044_2011	207	144	39	105	0.270833
463	12044_2011	208	144	31	113	0.215278
464	12044_2011	209	144	14	130	0.0972222
465	12044_2011	210	144	8	136	0.0555556
466	12044_2011	211	144	12	132	0.0833333
467	12044_2011	212	144	18	126	0.125
468	12044_2011	213	144	21	123	0.145833
469	12044_2011	214	144	17	127	0.118056
470	12044_2011	215	144	17	127	0.118056
471	12044_2011	216	144	23	121	0.159722
472	12044_2011	217	144	30	114	0.208333
473	12044_2011	218	144	51	93	0.354167
474	12044_2011	219	144	23	121	0.159722
475	12044_2011	220	144	11	133	0.0763889
476	12044_2011	221	144	22	122	0.152778
477	12044_2011	222	144	48	96	0.333333
478	12044_2011	223	144	36	108	0.25
479	12044_2011	224	144	39	105	0.270833
480	12044_2011	225	138	9	129	0.0652174
481	12044_2011	226	144	7	137	0.0486111
482	12044_2011	227	144	16	128	0.111111
483	12044_2011	228	144	6	138	0.0416667
484	12044_2011	229	144	21	123	0.145833
485	12044_2011	230	144	18	126	0.125
486	12044_2011	231	144	25	119	0.173611
487	12044_2011	232	144	27	117	0.1875
488	12044_2011	233	144	13	131	0.0902778
489	12044_2011	234	144	17	127	0.118056
490	12044_2011	235	144	8	136	0.0555556
491	12044_2011	236	144	23	121	0.159722
492	12044_2011	237	144	13	131	0.0902778
493	12044_2011	238	144	30	114	0.208333
494	12044_2011	239	144	13	131	0.0902778
495	12044_2011	240	144	48	96	0.333333
496	12044_2011	241	144	64	80	0.444444
497	12044_2011	242	144	79	65	0.548611
498	12044_2011	243	144	56	88	0.388889
499	12044_2011	244	144	73	71	0.506944
500	12044_2011	245	144	72	72	0.5
501	12044_2011	246	144	57	87	0.395833
502	12044_2011	247	144	44	100	0.305556
503	12044_2011	248	144	57	87	0.395833
504	12044_2011	249	144	55	89	0.381944
505	12044_2011	250	144	64	80	0.444444
506	12044_2011	251	144	75	69	0.520833
507	12044_2011	252	144	53	91	0.368056
508	12044_2011	253	144	63	81	0.4375
509	12044_2011	254	144	20	124	0.138889
510	12044_2011	255	144	6	138	0.0416667
511	12047_2010	1	144	93	51	0.645833
512	12047_2010	2	144	127	17	0.881944
513	12047_2010	3	144	112	32	0.777778
514	12047_2010	4	144	88	56	0.611111
515	12047_2010	5	144	110	34	0.763889
516	12047_2010	6	144	101	43	0.701389
517	12047_2010	7	144	86	58	0.597222
518	12047_2010	8	144	96	48	0.666667
519	12047_2010	9	144	122	22	0.847222
520	12047_2010	10	144	79	65	0.548611
521	12047_2010	11	144	91	53	0.631944
522	12047_2010	12	144	102	42	0.708333
523	12047_2010	13	144	89	55	0.618056
524	12047_2010	14	144	79	65	0.548611
525	12047_2010	15	144	47	97	0.326389
526	12047_2010	16	144	92	52	0.638889
527	12047_2010	17	144	61	83	0.423611
528	12047_2010	18	144	71	73	0.493056
529	12047_2010	19	144	87	57	0.604167
530	12047_2010	20	144	103	41	0.715278
531	12047_2010	21	144	108	36	0.75
532	12047_2010	22	144	98	46	0.680556
533	12047_2010	23	144	36	108	0.25
534	12047_2010	24	144	117	27	0.8125
535	12047_2010	25	144	108	36	0.75
536	12047_2010	26	144	93	51	0.645833
537	12047_2010	27	144	70	74	0.486111
538	12047_2010	28	144	56	88	0.388889
539	12047_2010	29	144	32	112	0.222222
540	12047_2010	30	144	82	62	0.569444
541	12047_2010	31	144	40	104	0.277778
542	12047_2010	32	144	54	90	0.375
543	12047_2010	33	144	33	111	0.229167
544	12047_2010	34	144	12	132	0.0833333
545	12047_2010	35	144	9	135	0.0625
546	12047_2010	36	144	7	137	0.0486111
547	12047_2010	37	144	3	141	0.0208333
548	12047_2010	38	144	6	138	0.0416667
549	12047_2010	39	144	14	130	0.0972222
550	12047_2010	40	144	0	144	0
551	12047_2010	41	144	3	141	0.0208333
552	12047_2010	42	144	11	133	0.0763889
553	12047_2010	43	144	6	138	0.0416667
554	12047_2010	44	144	5	139	0.0347222
555	12047_2010	45	144	12	132	0.0833333
556	12047_2010	46	144	3	141	0.0208333
557	12047_2010	47	144	2	142	0.0138889
558	12047_2010	48	144	3	141	0.0208333
559	12047_2010	49	144	19	125	0.131944
560	12047_2010	50	144	25	119	0.173611
561	12047_2010	51	144	7	137	0.0486111
562	12047_2010	52	144	20	124	0.138889
563	12047_2010	53	144	8	136	0.0555556
564	12047_2010	54	144	5	139	0.0347222
565	12047_2010	55	144	9	135	0.0625
566	12047_2010	56	144	14	130	0.0972222
567	12047_2010	57	144	7	137	0.0486111
568	12047_2010	58	144	6	138	0.0416667
569	12047_2010	59	144	5	139	0.0347222
570	12047_2010	60	144	4	140	0.0277778
571	12047_2010	61	144	1	143	0.00694444
572	12047_2010	62	144	13	131	0.0902778
573	12047_2010	63	144	0	144	0
574	12047_2010	64	144	20	124	0.138889
575	12047_2010	65	144	19	125	0.131944
576	12047_2010	66	144	6	138	0.0416667
577	12047_2010	67	144	14	130	0.0972222
578	12047_2010	68	144	13	131	0.0902778
579	12047_2010	69	144	12	132	0.0833333
580	12047_2010	70	144	10	134	0.0694444
581	12047_2010	71	144	6	138	0.0416667
582	12047_2010	72	144	4	140	0.0277778
583	12047_2010	73	144	5	139	0.0347222
584	12047_2010	74	144	20	124	0.138889
585	12047_2010	75	144	1	143	0.00694444
586	12047_2010	76	144	14	130	0.0972222
587	12047_2010	77	144	4	140	0.0277778
588	12047_2010	78	144	8	136	0.0555556
589	12047_2010	79	144	1	143	0.00694444
590	12047_2010	80	144	15	129	0.104167
591	12047_2010	81	144	6	138	0.0416667
592	12047_2010	82	144	2	142	0.0138889
593	12047_2010	83	144	17	127	0.118056
594	12047_2010	84	144	6	138	0.0416667
595	12047_2010	85	144	12	132	0.0833333
596	12047_2010	86	144	3	141	0.0208333
597	12047_2010	87	144	2	142	0.0138889
598	12047_2010	88	144	8	136	0.0555556
599	12047_2010	89	144	2	142	0.0138889
600	12047_2010	90	144	0	144	0
601	12047_2010	91	144	16	128	0.111111
602	12047_2010	92	144	8	136	0.0555556
603	12047_2010	93	144	3	141	0.0208333
604	12047_2010	94	144	11	133	0.0763889
605	12047_2010	95	144	12	132	0.0833333
606	12047_2010	96	144	8	136	0.0555556
607	12047_2010	97	144	9	135	0.0625
608	12047_2010	98	144	0	144	0
609	12047_2010	99	144	4	140	0.0277778
610	12047_2010	100	150	3	147	0.02
611	12047_2010	101	144	7	137	0.0486111
612	12047_2010	102	144	9	135	0.0625
613	12047_2010	103	144	4	140	0.0277778
614	12047_2010	104	144	2	142	0.0138889
615	12047_2010	105	144	3	141	0.0208333
616	12047_2010	106	144	6	138	0.0416667
617	12047_2010	107	144	18	126	0.125
618	12047_2010	108	144	12	132	0.0833333
619	12047_2010	109	144	6	138	0.0416667
620	12047_2010	110	144	34	110	0.236111
621	12047_2010	111	144	9	135	0.0625
622	12047_2010	112	144	7	137	0.0486111
623	12047_2010	113	144	3	141	0.0208333
624	12047_2010	114	144	34	110	0.236111
625	12047_2010	115	144	0	144	0
626	12047_2010	116	144	1	143	0.00694444
627	12047_2010	117	144	1	143	0.00694444
628	12047_2010	118	144	0	144	0
629	12047_2010	119	144	0	144	0
630	12047_2010	120	144	18	126	0.125
631	12047_2010	121	144	0	144	0
632	12047_2010	122	144	1	143	0.00694444
633	12047_2010	123	144	7	137	0.0486111
634	12047_2010	124	144	2	142	0.0138889
635	12047_2010	125	144	5	139	0.0347222
636	12047_2010	126	144	0	144	0
637	12047_2010	127	144	4	140	0.0277778
638	12047_2010	128	144	6	138	0.0416667
639	12047_2010	129	144	0	144	0
640	12047_2010	130	144	5	139	0.0347222
641	12047_2010	131	144	0	144	0
642	12047_2010	132	144	5	139	0.0347222
643	12047_2010	133	144	9	135	0.0625
644	12047_2010	134	144	1	143	0.00694444
645	12047_2010	135	144	3	141	0.0208333
646	12047_2010	136	144	7	137	0.0486111
647	12047_2010	137	144	2	142	0.0138889
648	12047_2010	138	144	5	139	0.0347222
649	12047_2010	139	144	2	142	0.0138889
650	12047_2010	140	144	1	143	0.00694444
651	12047_2010	141	144	18	126	0.125
652	12047_2010	142	144	4	140	0.0277778
653	12047_2010	143	144	4	140	0.0277778
654	12047_2010	144	144	17	127	0.118056
655	12047_2010	145	144	12	132	0.0833333
656	12047_2010	146	144	15	129	0.104167
657	12047_2010	147	144	4	140	0.0277778
658	12047_2010	148	144	10	134	0.0694444
659	12047_2010	149	144	2	142	0.0138889
660	12047_2010	150	144	0	144	0
661	12047_2010	151	144	0	144	0
662	12047_2010	152	144	9	135	0.0625
663	12047_2010	153	144	0	144	0
664	12047_2010	154	144	9	135	0.0625
665	12047_2010	155	144	3	141	0.0208333
666	12047_2010	156	144	8	136	0.0555556
667	12047_2010	157	144	6	138	0.0416667
668	12047_2010	158	144	2	142	0.0138889
669	12047_2010	159	144	4	140	0.0277778
670	12047_2010	160	144	8	136	0.0555556
671	12047_2010	161	144	10	134	0.0694444
672	12047_2010	162	144	1	143	0.00694444
673	12047_2010	163	144	10	134	0.0694444
674	12047_2010	164	144	1	143	0.00694444
675	12047_2010	165	144	8	136	0.0555556
676	12047_2010	166	144	15	129	0.104167
677	12047_2010	167	144	14	130	0.0972222
678	12047_2010	168	144	8	136	0.0555556
679	12047_2010	169	144	8	136	0.0555556
680	12047_2010	170	144	16	128	0.111111
681	12047_2010	171	144	6	138	0.0416667
682	12047_2010	172	144	4	140	0.0277778
683	12047_2010	173	144	10	134	0.0694444
684	12047_2010	174	144	0	144	0
685	12047_2010	175	144	8	136	0.0555556
686	12047_2010	176	144	15	129	0.104167
687	12047_2010	177	144	1	143	0.00694444
688	12047_2010	178	144	0	144	0
689	12047_2010	179	144	7	137	0.0486111
690	12047_2010	180	144	8	136	0.0555556
691	12047_2010	181	144	12	132	0.0833333
692	12047_2010	182	144	1	143	0.00694444
693	12047_2010	183	144	4	140	0.0277778
694	12047_2010	184	144	10	134	0.0694444
695	12047_2010	185	144	0	144	0
696	12047_2010	186	144	1	143	0.00694444
697	12047_2010	187	144	6	138	0.0416667
698	12047_2010	188	144	16	128	0.111111
699	12047_2010	189	144	6	138	0.0416667
700	12047_2010	190	144	1	143	0.00694444
701	12047_2010	191	144	7	137	0.0486111
702	12047_2010	192	144	14	130	0.0972222
703	12047_2010	193	144	14	130	0.0972222
704	12047_2010	194	144	5	139	0.0347222
705	12047_2010	195	144	1	143	0.00694444
706	12047_2010	196	144	0	144	0
707	12047_2010	197	144	15	129	0.104167
708	12047_2010	198	144	19	125	0.131944
709	12047_2010	199	144	7	137	0.0486111
710	12047_2010	200	144	4	140	0.0277778
711	12047_2010	201	144	14	130	0.0972222
712	12047_2010	202	144	10	134	0.0694444
713	12047_2010	203	144	2	142	0.0138889
714	12047_2010	204	144	4	140	0.0277778
715	12047_2010	205	144	19	125	0.131944
716	12047_2010	206	144	8	136	0.0555556
717	12047_2010	207	144	13	131	0.0902778
718	12047_2010	208	144	16	128	0.111111
719	12047_2010	209	144	16	128	0.111111
720	12047_2010	210	144	7	137	0.0486111
721	12047_2010	211	144	2	142	0.0138889
722	12047_2010	212	144	5	139	0.0347222
723	12047_2010	213	144	8	136	0.0555556
724	12047_2010	214	144	17	127	0.118056
725	12047_2010	215	144	21	123	0.145833
726	12047_2010	216	144	16	128	0.111111
727	12047_2010	217	144	19	125	0.131944
728	12047_2010	218	144	9	135	0.0625
729	12047_2010	219	144	11	133	0.0763889
730	12047_2010	220	144	17	127	0.118056
731	12047_2010	221	144	9	135	0.0625
732	12047_2010	222	144	4	140	0.0277778
733	12047_2010	223	144	7	137	0.0486111
734	12047_2010	224	144	22	122	0.152778
735	12047_2010	225	144	20	124	0.138889
736	12047_2010	226	138	5	133	0.0362319
737	12047_2010	227	144	16	128	0.111111
738	12047_2010	228	144	7	137	0.0486111
739	12047_2010	229	144	13	131	0.0902778
740	12047_2010	230	144	2	142	0.0138889
741	12047_2010	231	144	12	132	0.0833333
742	12047_2010	232	144	14	130	0.0972222
743	12047_2010	233	144	16	128	0.111111
744	12047_2010	234	144	20	124	0.138889
745	12047_2010	235	144	7	137	0.0486111
746	12047_2010	236	144	4	140	0.0277778
747	12047_2010	237	144	8	136	0.0555556
748	12047_2010	238	144	5	139	0.0347222
749	12047_2010	239	144	2	142	0.0138889
750	12047_2010	240	144	4	140	0.0277778
751	12047_2010	241	144	4	140	0.0277778
752	12047_2010	242	144	8	136	0.0555556
753	12047_2010	243	144	7	137	0.0486111
754	12047_2010	244	144	9	135	0.0625
755	12047_2010	245	144	2	142	0.0138889
756	12047_2010	246	144	8	136	0.0555556
757	12047_2010	247	144	24	120	0.166667
758	12047_2010	248	144	14	130	0.0972222
759	12047_2010	249	144	2	142	0.0138889
760	12047_2010	250	144	6	138	0.0416667
761	12047_2010	251	144	28	116	0.194444
762	12047_2010	252	144	28	116	0.194444
763	12047_2010	253	144	51	93	0.354167
764	12047_2010	254	144	30	114	0.208333
765	12047_2010	255	144	58	86	0.402778
766	12047_2011	1	144	102	42	0.708333
767	12047_2011	2	144	99	45	0.6875
768	12047_2011	3	144	113	31	0.784722
769	12047_2011	4	144	76	68	0.527778
770	12047_2011	5	144	130	14	0.902778
771	12047_2011	6	144	122	22	0.847222
772	12047_2011	7	144	117	27	0.8125
773	12047_2011	8	144	118	26	0.819444
774	12047_2011	9	144	131	13	0.909722
775	12047_2011	10	144	132	12	0.916667
776	12047_2011	11	144	106	38	0.736111
777	12047_2011	12	144	91	53	0.631944
778	12047_2011	13	144	125	19	0.868056
779	12047_2011	14	144	126	18	0.875
780	12047_2011	15	144	116	28	0.805556
781	12047_2011	16	144	64	80	0.444444
782	12047_2011	17	144	54	90	0.375
783	12047_2011	18	144	72	72	0.5
784	12047_2011	19	144	59	85	0.409722
785	12047_2011	20	144	79	65	0.548611
786	12047_2011	21	144	86	58	0.597222
787	12047_2011	22	144	42	102	0.291667
788	12047_2011	23	144	84	60	0.583333
789	12047_2011	24	144	66	78	0.458333
790	12047_2011	25	144	61	83	0.423611
791	12047_2011	26	144	22	122	0.152778
792	12047_2011	27	144	38	106	0.263889
793	12047_2011	28	144	71	73	0.493056
794	12047_2011	29	144	59	85	0.409722
795	12047_2011	30	144	73	71	0.506944
796	12047_2011	31	144	52	92	0.361111
797	12047_2011	32	144	66	78	0.458333
798	12047_2011	33	144	68	76	0.472222
799	12047_2011	34	144	46	98	0.319444
800	12047_2011	35	144	61	83	0.423611
801	12047_2011	36	144	79	65	0.548611
802	12047_2011	37	144	15	129	0.104167
803	12047_2011	38	144	11	133	0.0763889
804	12047_2011	39	144	2	142	0.0138889
805	12047_2011	40	144	31	113	0.215278
806	12047_2011	41	144	14	130	0.0972222
807	12047_2011	42	144	25	119	0.173611
808	12047_2011	43	144	7	137	0.0486111
809	12047_2011	44	144	8	136	0.0555556
810	12047_2011	45	144	18	126	0.125
811	12047_2011	46	144	6	138	0.0416667
812	12047_2011	47	144	18	126	0.125
813	12047_2011	48	144	8	136	0.0555556
814	12047_2011	49	144	10	134	0.0694444
815	12047_2011	50	144	6	138	0.0416667
816	12047_2011	51	144	3	141	0.0208333
817	12047_2011	52	144	10	134	0.0694444
818	12047_2011	53	144	28	116	0.194444
819	12047_2011	54	144	24	120	0.166667
820	12047_2011	55	144	13	131	0.0902778
821	12047_2011	56	144	5	139	0.0347222
822	12047_2011	57	144	9	135	0.0625
823	12047_2011	58	144	9	135	0.0625
824	12047_2011	59	144	1	143	0.00694444
825	12047_2011	60	144	3	141	0.0208333
826	12047_2011	61	144	4	140	0.0277778
827	12047_2011	62	144	21	123	0.145833
828	12047_2011	63	144	11	133	0.0763889
829	12047_2011	64	144	3	141	0.0208333
830	12047_2011	65	144	9	135	0.0625
831	12047_2011	66	144	9	135	0.0625
832	12047_2011	67	144	2	142	0.0138889
833	12047_2011	68	144	4	140	0.0277778
834	12047_2011	69	144	2	142	0.0138889
835	12047_2011	70	144	3	141	0.0208333
836	12047_2011	71	144	10	134	0.0694444
837	12047_2011	72	144	8	136	0.0555556
838	12047_2011	73	144	30	114	0.208333
839	12047_2011	74	144	9	135	0.0625
840	12047_2011	75	144	9	135	0.0625
841	12047_2011	76	144	2	142	0.0138889
842	12047_2011	77	144	24	120	0.166667
843	12047_2011	78	144	8	136	0.0555556
844	12047_2011	79	144	15	129	0.104167
845	12047_2011	80	144	16	128	0.111111
846	12047_2011	81	144	15	129	0.104167
847	12047_2011	82	144	2	142	0.0138889
848	12047_2011	83	144	11	133	0.0763889
849	12047_2011	84	144	6	138	0.0416667
850	12047_2011	85	144	12	132	0.0833333
851	12047_2011	86	144	8	136	0.0555556
852	12047_2011	87	144	21	123	0.145833
853	12047_2011	88	144	23	121	0.159722
854	12047_2011	89	144	13	131	0.0902778
855	12047_2011	90	144	13	131	0.0902778
856	12047_2011	91	144	4	140	0.0277778
857	12047_2011	92	144	13	131	0.0902778
858	12047_2011	93	144	25	119	0.173611
859	12047_2011	94	144	15	129	0.104167
860	12047_2011	95	144	22	122	0.152778
861	12047_2011	96	144	15	129	0.104167
862	12047_2011	97	144	11	133	0.0763889
863	12047_2011	98	144	7	137	0.0486111
864	12047_2011	99	150	10	140	0.0666667
865	12047_2011	100	144	12	132	0.0833333
866	12047_2011	101	144	25	119	0.173611
867	12047_2011	102	144	22	122	0.152778
868	12047_2011	103	144	15	129	0.104167
869	12047_2011	104	144	3	141	0.0208333
870	12047_2011	105	144	0	144	0
871	12047_2011	106	144	1	143	0.00694444
872	12047_2011	107	144	6	138	0.0416667
873	12047_2011	108	144	7	137	0.0486111
874	12047_2011	109	144	9	135	0.0625
875	12047_2011	110	144	9	135	0.0625
876	12047_2011	111	144	8	136	0.0555556
877	12047_2011	112	144	15	129	0.104167
878	12047_2011	113	144	8	136	0.0555556
879	12047_2011	114	144	17	127	0.118056
880	12047_2011	115	144	10	134	0.0694444
881	12047_2011	116	144	31	113	0.215278
882	12047_2011	117	144	10	134	0.0694444
883	12047_2011	118	144	27	117	0.1875
884	12047_2011	119	144	16	128	0.111111
885	12047_2011	120	144	17	127	0.118056
886	12047_2011	121	144	25	119	0.173611
887	12047_2011	122	144	10	134	0.0694444
888	12047_2011	123	144	11	133	0.0763889
889	12047_2011	124	144	9	135	0.0625
890	12047_2011	125	144	26	118	0.180556
891	12047_2011	126	144	1	143	0.00694444
892	12047_2011	127	144	11	133	0.0763889
893	12047_2011	128	144	12	132	0.0833333
894	12047_2011	129	144	15	129	0.104167
895	12047_2011	130	144	7	137	0.0486111
896	12047_2011	131	144	7	137	0.0486111
897	12047_2011	132	144	11	133	0.0763889
898	12047_2011	133	144	6	138	0.0416667
899	12047_2011	134	144	7	137	0.0486111
900	12047_2011	135	144	0	144	0
901	12047_2011	136	144	10	134	0.0694444
902	12047_2011	137	144	14	130	0.0972222
903	12047_2011	138	144	19	125	0.131944
904	12047_2011	139	144	19	125	0.131944
905	12047_2011	140	144	15	129	0.104167
906	12047_2011	141	144	15	129	0.104167
907	12047_2011	142	144	11	133	0.0763889
908	12047_2011	143	144	12	132	0.0833333
909	12047_2011	144	144	13	131	0.0902778
910	12047_2011	145	144	5	139	0.0347222
911	12047_2011	146	144	5	139	0.0347222
912	12047_2011	147	144	5	139	0.0347222
913	12047_2011	148	144	11	133	0.0763889
914	12047_2011	149	144	0	144	0
915	12047_2011	150	144	16	128	0.111111
916	12047_2011	151	144	0	144	0
917	12047_2011	152	144	5	139	0.0347222
918	12047_2011	153	144	5	139	0.0347222
919	12047_2011	154	144	14	130	0.0972222
920	12047_2011	155	144	0	144	0
921	12047_2011	156	144	7	137	0.0486111
922	12047_2011	157	144	2	142	0.0138889
923	12047_2011	158	144	14	130	0.0972222
924	12047_2011	159	144	10	134	0.0694444
925	12047_2011	160	144	17	127	0.118056
926	12047_2011	161	144	12	132	0.0833333
927	12047_2011	162	144	0	144	0
928	12047_2011	163	144	22	122	0.152778
929	12047_2011	164	144	0	144	0
930	12047_2011	165	144	23	121	0.159722
931	12047_2011	166	144	12	132	0.0833333
932	12047_2011	167	144	19	125	0.131944
933	12047_2011	168	144	18	126	0.125
934	12047_2011	169	144	9	135	0.0625
935	12047_2011	170	144	11	133	0.0763889
936	12047_2011	171	144	8	136	0.0555556
937	12047_2011	172	144	6	138	0.0416667
938	12047_2011	173	144	19	125	0.131944
939	12047_2011	174	144	13	131	0.0902778
940	12047_2011	175	144	49	95	0.340278
941	12047_2011	176	144	10	134	0.0694444
942	12047_2011	177	144	8	136	0.0555556
943	12047_2011	178	144	16	128	0.111111
944	12047_2011	179	144	17	127	0.118056
945	12047_2011	180	144	14	130	0.0972222
946	12047_2011	181	144	14	130	0.0972222
947	12047_2011	182	144	14	130	0.0972222
948	12047_2011	183	144	29	115	0.201389
949	12047_2011	184	144	8	136	0.0555556
950	12047_2011	185	144	5	139	0.0347222
951	12047_2011	186	144	8	136	0.0555556
952	12047_2011	187	144	13	131	0.0902778
953	12047_2011	188	144	3	141	0.0208333
954	12047_2011	189	144	6	138	0.0416667
955	12047_2011	190	144	8	136	0.0555556
956	12047_2011	191	144	9	135	0.0625
957	12047_2011	192	144	12	132	0.0833333
958	12047_2011	193	144	1	143	0.00694444
959	12047_2011	194	144	13	131	0.0902778
960	12047_2011	195	144	18	126	0.125
961	12047_2011	196	144	3	141	0.0208333
962	12047_2011	197	144	4	140	0.0277778
963	12047_2011	198	144	3	141	0.0208333
964	12047_2011	199	144	14	130	0.0972222
965	12047_2011	200	144	13	131	0.0902778
966	12047_2011	201	144	23	121	0.159722
967	12047_2011	202	144	19	125	0.131944
968	12047_2011	203	144	9	135	0.0625
969	12047_2011	204	144	13	131	0.0902778
970	12047_2011	205	144	14	130	0.0972222
971	12047_2011	206	144	16	128	0.111111
972	12047_2011	207	144	24	120	0.166667
973	12047_2011	208	144	9	135	0.0625
974	12047_2011	209	144	29	115	0.201389
975	12047_2011	210	144	6	138	0.0416667
976	12047_2011	211	144	6	138	0.0416667
977	12047_2011	212	144	27	117	0.1875
978	12047_2011	213	144	3	141	0.0208333
979	12047_2011	214	144	29	115	0.201389
980	12047_2011	215	144	18	126	0.125
981	12047_2011	216	144	12	132	0.0833333
982	12047_2011	217	144	15	129	0.104167
983	12047_2011	218	144	13	131	0.0902778
984	12047_2011	219	144	23	121	0.159722
985	12047_2011	220	144	17	127	0.118056
986	12047_2011	221	144	8	136	0.0555556
987	12047_2011	222	144	35	109	0.243056
988	12047_2011	223	144	34	110	0.236111
989	12047_2011	224	144	18	126	0.125
990	12047_2011	225	138	15	123	0.108696
991	12047_2011	226	144	6	138	0.0416667
992	12047_2011	227	144	11	133	0.0763889
993	12047_2011	228	144	9	135	0.0625
994	12047_2011	229	144	9	135	0.0625
995	12047_2011	230	144	8	136	0.0555556
996	12047_2011	231	144	6	138	0.0416667
997	12047_2011	232	144	7	137	0.0486111
998	12047_2011	233	144	11	133	0.0763889
999	12047_2011	234	144	7	137	0.0486111
1000	12047_2011	235	144	18	126	0.125
1001	12047_2011	236	144	13	131	0.0902778
1002	12047_2011	237	144	13	131	0.0902778
1003	12047_2011	238	144	12	132	0.0833333
1004	12047_2011	239	144	11	133	0.0763889
1005	12047_2011	240	144	62	82	0.430556
1006	12047_2011	241	144	59	85	0.409722
1007	12047_2011	242	144	72	72	0.5
1008	12047_2011	243	144	64	80	0.444444
1009	12047_2011	244	144	72	72	0.5
1010	12047_2011	245	144	77	67	0.534722
1011	12047_2011	246	144	76	68	0.527778
1012	12047_2011	247	144	66	78	0.458333
1013	12047_2011	248	144	74	70	0.513889
1014	12047_2011	249	144	69	75	0.479167
1015	12047_2011	250	144	73	71	0.506944
1016	12047_2011	251	144	77	67	0.534722
1017	12047_2011	252	144	69	75	0.479167
1018	12047_2011	253	144	69	75	0.479167
1019	12047_2011	254	144	23	121	0.159722
1020	12047_2011	255	144	21	123	0.145833
1021	12048_2011	1	144	85	59	0.590278
1022	12048_2011	2	144	127	17	0.881944
1023	12048_2011	3	144	131	13	0.909722
1024	12048_2011	4	144	135	9	0.9375
1025	12048_2011	5	144	111	33	0.770833
1026	12048_2011	6	144	126	18	0.875
1027	12048_2011	7	144	125	19	0.868056
1028	12048_2011	8	144	135	9	0.9375
1029	12048_2011	9	144	69	75	0.479167
1030	12048_2011	10	144	77	67	0.534722
1031	12048_2011	11	144	88	56	0.611111
1032	12048_2011	12	144	86	58	0.597222
1033	12048_2011	13	144	83	61	0.576389
1034	12048_2011	14	144	127	17	0.881944
1035	12048_2011	15	144	129	15	0.895833
1036	12048_2011	16	144	95	49	0.659722
1037	12048_2011	17	144	122	22	0.847222
1038	12048_2011	18	144	121	23	0.840278
1039	12048_2011	19	144	105	39	0.729167
1040	12048_2011	20	144	38	106	0.263889
1041	12048_2011	21	144	131	13	0.909722
1042	12048_2011	22	144	91	53	0.631944
1043	12048_2011	23	144	119	25	0.826389
1044	12048_2011	24	144	75	69	0.520833
1045	12048_2011	25	144	125	19	0.868056
1046	12048_2011	26	144	89	55	0.618056
1047	12048_2011	27	144	107	37	0.743056
1048	12048_2011	28	144	73	71	0.506944
1049	12048_2011	29	144	81	63	0.5625
1050	12048_2011	30	144	125	19	0.868056
1051	12048_2011	31	144	119	25	0.826389
1052	12048_2011	32	144	117	27	0.8125
1053	12048_2011	33	144	100	44	0.694444
1054	12048_2011	34	144	64	80	0.444444
1055	12048_2011	35	144	134	10	0.930556
1056	12048_2011	36	144	65	79	0.451389
1057	12048_2011	37	144	78	66	0.541667
1058	12048_2011	38	144	68	76	0.472222
1059	12048_2011	39	144	55	89	0.381944
1060	12048_2011	40	144	68	76	0.472222
1061	12048_2011	41	144	48	96	0.333333
1062	12048_2011	42	144	30	114	0.208333
1063	12048_2011	43	144	47	97	0.326389
1064	12048_2011	44	144	41	103	0.284722
1065	12048_2011	45	144	21	123	0.145833
1066	12048_2011	46	144	31	113	0.215278
1067	12048_2011	47	144	29	115	0.201389
1068	12048_2011	48	144	19	125	0.131944
1069	12048_2011	49	144	4	140	0.0277778
1070	12048_2011	50	144	46	98	0.319444
1071	12048_2011	51	144	32	112	0.222222
1072	12048_2011	52	144	4	140	0.0277778
1073	12048_2011	53	144	4	140	0.0277778
1074	12048_2011	54	144	20	124	0.138889
1075	12048_2011	55	144	25	119	0.173611
1076	12048_2011	56	144	10	134	0.0694444
1077	12048_2011	57	144	17	127	0.118056
1078	12048_2011	58	144	22	122	0.152778
1079	12048_2011	59	144	26	118	0.180556
1080	12048_2011	60	144	15	129	0.104167
1081	12048_2011	61	144	7	137	0.0486111
1082	12048_2011	62	144	8	136	0.0555556
1083	12048_2011	63	144	11	133	0.0763889
1084	12048_2011	64	144	6	138	0.0416667
1085	12048_2011	65	144	30	114	0.208333
1086	12048_2011	66	144	16	128	0.111111
1087	12048_2011	67	144	19	125	0.131944
1088	12048_2011	68	144	24	120	0.166667
1089	12048_2011	69	144	13	131	0.0902778
1090	12048_2011	70	144	35	109	0.243056
1091	12048_2011	71	144	18	126	0.125
1092	12048_2011	72	144	30	114	0.208333
1093	12048_2011	73	144	18	126	0.125
1094	12048_2011	74	144	31	113	0.215278
1095	12048_2011	75	144	13	131	0.0902778
1096	12048_2011	76	144	18	126	0.125
1097	12048_2011	77	144	42	102	0.291667
1098	12048_2011	78	144	32	112	0.222222
1099	12048_2011	79	144	7	137	0.0486111
1100	12048_2011	80	144	18	126	0.125
1101	12048_2011	81	144	8	136	0.0555556
1102	12048_2011	82	144	29	115	0.201389
1103	12048_2011	83	144	8	136	0.0555556
1104	12048_2011	84	144	7	137	0.0486111
1105	12048_2011	85	144	2	142	0.0138889
1106	12048_2011	86	144	12	132	0.0833333
1107	12048_2011	87	144	9	135	0.0625
1108	12048_2011	88	144	16	128	0.111111
1109	12048_2011	89	144	13	131	0.0902778
1110	12048_2011	90	144	28	116	0.194444
1111	12048_2011	91	144	16	128	0.111111
1112	12048_2011	92	144	6	138	0.0416667
1113	12048_2011	93	144	10	134	0.0694444
1114	12048_2011	94	144	30	114	0.208333
1115	12048_2011	95	144	29	115	0.201389
1116	12048_2011	96	144	84	60	0.583333
1117	12048_2011	97	144	29	115	0.201389
1118	12048_2011	98	144	24	120	0.166667
1119	12048_2011	99	150	11	139	0.0733333
1120	12048_2011	100	144	27	117	0.1875
1121	12048_2011	101	144	41	103	0.284722
1122	12048_2011	102	144	31	113	0.215278
1123	12048_2011	103	144	58	86	0.402778
1124	12048_2011	104	144	12	132	0.0833333
1125	12048_2011	105	144	22	122	0.152778
1126	12048_2011	106	144	16	128	0.111111
1127	12048_2011	107	144	15	129	0.104167
1128	12048_2011	108	144	24	120	0.166667
1129	12048_2011	109	144	21	123	0.145833
1130	12048_2011	110	144	36	108	0.25
1131	12048_2011	111	144	24	120	0.166667
1132	12048_2011	112	144	22	122	0.152778
1133	12048_2011	113	144	18	126	0.125
1134	12048_2011	114	144	30	114	0.208333
1135	12048_2011	115	144	24	120	0.166667
1136	12048_2011	116	144	37	107	0.256944
1137	12048_2011	117	144	35	109	0.243056
1138	12048_2011	118	144	27	117	0.1875
1139	12048_2011	119	144	23	121	0.159722
1140	12048_2011	120	144	27	117	0.1875
1141	12048_2011	121	144	30	114	0.208333
1142	12048_2011	122	144	15	129	0.104167
1143	12048_2011	123	144	19	125	0.131944
1144	12048_2011	124	144	27	117	0.1875
1145	12048_2011	125	144	11	133	0.0763889
1146	12048_2011	126	144	3	141	0.0208333
1147	12048_2011	127	144	16	128	0.111111
1148	12048_2011	128	144	15	129	0.104167
1149	12048_2011	129	144	9	135	0.0625
1150	12048_2011	130	144	4	140	0.0277778
1151	12048_2011	131	144	13	131	0.0902778
1152	12048_2011	132	144	19	125	0.131944
1153	12048_2011	133	144	19	125	0.131944
1154	12048_2011	134	144	23	121	0.159722
1155	12048_2011	135	144	9	135	0.0625
1156	12048_2011	136	144	8	136	0.0555556
1157	12048_2011	137	144	7	137	0.0486111
1158	12048_2011	138	144	20	124	0.138889
1159	12048_2011	139	144	9	135	0.0625
1160	12048_2011	140	144	14	130	0.0972222
1161	12048_2011	141	144	10	134	0.0694444
1162	12048_2011	142	144	12	132	0.0833333
1163	12048_2011	143	144	32	112	0.222222
1164	12048_2011	144	144	31	113	0.215278
1165	12048_2011	145	144	23	121	0.159722
1166	12048_2011	146	144	37	107	0.256944
1167	12048_2011	147	144	21	123	0.145833
1168	12048_2011	148	144	14	130	0.0972222
1169	12048_2011	149	144	13	131	0.0902778
1170	12048_2011	150	144	14	130	0.0972222
1171	12048_2011	151	144	8	136	0.0555556
1172	12048_2011	152	144	20	124	0.138889
1173	12048_2011	153	144	12	132	0.0833333
1174	12048_2011	154	144	7	137	0.0486111
1175	12048_2011	155	144	41	103	0.284722
1176	12048_2011	156	144	21	123	0.145833
1177	12048_2011	157	144	17	127	0.118056
1178	12048_2011	158	144	5	139	0.0347222
1179	12048_2011	159	144	4	140	0.0277778
1180	12048_2011	160	144	17	127	0.118056
1181	12048_2011	161	144	26	118	0.180556
1182	12048_2011	162	144	32	112	0.222222
1183	12048_2011	163	144	23	121	0.159722
1184	12048_2011	164	144	20	124	0.138889
1185	12048_2011	165	144	14	130	0.0972222
1186	12048_2011	166	144	12	132	0.0833333
1187	12048_2011	167	144	22	122	0.152778
1188	12048_2011	168	144	22	122	0.152778
1189	12048_2011	169	144	15	129	0.104167
1190	12048_2011	170	144	12	132	0.0833333
1191	12048_2011	171	144	7	137	0.0486111
1192	12048_2011	172	144	9	135	0.0625
1193	12048_2011	173	144	24	120	0.166667
1194	12048_2011	174	144	25	119	0.173611
1195	12048_2011	175	144	26	118	0.180556
1196	12048_2011	176	144	13	131	0.0902778
1197	12048_2011	177	144	21	123	0.145833
1198	12048_2011	178	144	37	107	0.256944
1199	12048_2011	179	144	22	122	0.152778
1200	12048_2011	180	144	9	135	0.0625
1201	12048_2011	181	144	15	129	0.104167
1202	12048_2011	182	144	15	129	0.104167
1203	12048_2011	183	144	34	110	0.236111
1204	12048_2011	184	144	39	105	0.270833
1205	12048_2011	185	144	20	124	0.138889
1206	12048_2011	186	144	27	117	0.1875
1207	12048_2011	187	144	50	94	0.347222
1208	12048_2011	188	144	37	107	0.256944
1209	12048_2011	189	144	12	132	0.0833333
1210	12048_2011	190	144	20	124	0.138889
1211	12048_2011	191	144	27	117	0.1875
1212	12048_2011	192	144	2	142	0.0138889
1213	12048_2011	193	144	13	131	0.0902778
1214	12048_2011	194	144	8	136	0.0555556
1215	12048_2011	195	144	30	114	0.208333
1216	12048_2011	196	144	21	123	0.145833
1217	12048_2011	197	144	22	122	0.152778
1218	12048_2011	198	144	28	116	0.194444
1219	12048_2011	199	144	42	102	0.291667
1220	12048_2011	200	144	20	124	0.138889
1221	12048_2011	201	144	30	114	0.208333
1222	12048_2011	202	144	17	127	0.118056
1223	12048_2011	203	144	13	131	0.0902778
1224	12048_2011	204	144	34	110	0.236111
1225	12048_2011	205	144	12	132	0.0833333
1226	12048_2011	206	144	21	123	0.145833
1227	12048_2011	207	144	23	121	0.159722
1228	12048_2011	208	144	26	118	0.180556
1229	12048_2011	209	144	20	124	0.138889
1230	12048_2011	210	144	41	103	0.284722
1231	12048_2011	211	144	20	124	0.138889
1232	12048_2011	212	144	12	132	0.0833333
1233	12048_2011	213	144	10	134	0.0694444
1234	12048_2011	214	144	29	115	0.201389
1235	12048_2011	215	144	27	117	0.1875
1236	12048_2011	216	144	56	88	0.388889
1237	12048_2011	217	144	41	103	0.284722
1238	12048_2011	218	144	28	116	0.194444
1239	12048_2011	219	144	41	103	0.284722
1240	12048_2011	220	144	22	122	0.152778
1241	12048_2011	221	144	38	106	0.263889
1242	12048_2011	222	144	12	132	0.0833333
1243	12048_2011	223	144	34	110	0.236111
1244	12048_2011	224	144	25	119	0.173611
1245	12048_2011	225	138	25	113	0.181159
1246	12048_2011	226	144	14	130	0.0972222
1247	12048_2011	227	144	39	105	0.270833
1248	12048_2011	228	144	21	123	0.145833
1249	12048_2011	229	144	6	138	0.0416667
1250	12048_2011	230	144	22	122	0.152778
1251	12048_2011	231	144	26	118	0.180556
1252	12048_2011	232	144	40	104	0.277778
1253	12048_2011	233	144	29	115	0.201389
1254	12048_2011	234	144	15	129	0.104167
1255	12048_2011	235	144	7	137	0.0486111
1256	12048_2011	236	144	17	127	0.118056
1257	12048_2011	237	144	22	122	0.152778
1258	12048_2011	238	144	33	111	0.229167
1259	12048_2011	239	144	23	121	0.159722
1260	12048_2011	240	144	59	85	0.409722
1261	12048_2011	241	144	47	97	0.326389
1262	12048_2011	242	144	61	83	0.423611
1263	12048_2011	243	144	46	98	0.319444
1264	12048_2011	244	144	79	65	0.548611
1265	12048_2011	245	144	74	70	0.513889
1266	12048_2011	246	144	81	63	0.5625
1267	12048_2011	247	144	81	63	0.5625
1268	12048_2011	248	144	81	63	0.5625
1269	12048_2011	249	144	83	61	0.576389
1270	12048_2011	250	144	78	66	0.541667
1271	12048_2011	251	144	24	120	0.166667
1272	12048_2011	252	144	44	100	0.305556
1273	12048_2011	253	144	42	102	0.291667
1274	12048_2011	254	144	15	129	0.104167
1275	12048_2011	255	144	15	129	0.104167
1276	12049_2011	1	144	128	16	0.888889
1277	12049_2011	2	144	93	51	0.645833
1278	12049_2011	3	144	114	30	0.791667
1279	12049_2011	4	144	79	65	0.548611
1280	12049_2011	5	144	93	51	0.645833
1281	12049_2011	6	144	95	49	0.659722
1282	12049_2011	7	144	127	17	0.881944
1283	12049_2011	8	144	87	57	0.604167
1284	12049_2011	9	144	116	28	0.805556
1285	12049_2011	10	144	116	28	0.805556
1286	12049_2011	11	144	129	15	0.895833
1287	12049_2011	12	144	124	20	0.861111
1288	12049_2011	13	144	122	22	0.847222
1289	12049_2011	14	144	84	60	0.583333
1290	12049_2011	15	144	66	78	0.458333
1291	12049_2011	16	144	68	76	0.472222
1292	12049_2011	17	144	54	90	0.375
1293	12049_2011	18	144	65	79	0.451389
1294	12049_2011	19	144	55	89	0.381944
1295	12049_2011	20	144	51	93	0.354167
1296	12049_2011	21	144	66	78	0.458333
1297	12049_2011	22	144	70	74	0.486111
1298	12049_2011	23	144	68	76	0.472222
1299	12049_2011	24	144	54	90	0.375
1300	12049_2011	25	144	59	85	0.409722
1301	12049_2011	26	144	47	97	0.326389
1302	12049_2011	27	144	49	95	0.340278
1303	12049_2011	28	144	125	19	0.868056
1304	12049_2011	29	144	73	71	0.506944
1305	12049_2011	30	144	97	47	0.673611
1306	12049_2011	31	144	72	72	0.5
1307	12049_2011	32	144	59	85	0.409722
1308	12049_2011	33	144	69	75	0.479167
1309	12049_2011	34	144	24	120	0.166667
1310	12049_2011	35	144	62	82	0.430556
1311	12049_2011	36	144	54	90	0.375
1312	12049_2011	37	144	15	129	0.104167
1313	12049_2011	38	144	12	132	0.0833333
1314	12049_2011	39	144	55	89	0.381944
1315	12049_2011	40	144	43	101	0.298611
1316	12049_2011	41	144	24	120	0.166667
1317	12049_2011	42	144	17	127	0.118056
1318	12049_2011	43	144	26	118	0.180556
1319	12049_2011	44	144	25	119	0.173611
1320	12049_2011	45	144	23	121	0.159722
1321	12049_2011	46	144	8	136	0.0555556
1322	12049_2011	47	144	14	130	0.0972222
1323	12049_2011	48	144	15	129	0.104167
1324	12049_2011	49	144	11	133	0.0763889
1325	12049_2011	50	144	17	127	0.118056
1326	12049_2011	51	144	7	137	0.0486111
1327	12049_2011	52	144	20	124	0.138889
1328	12049_2011	53	144	25	119	0.173611
1329	12049_2011	54	144	42	102	0.291667
1330	12049_2011	55	144	40	104	0.277778
1331	12049_2011	56	144	15	129	0.104167
1332	12049_2011	57	144	16	128	0.111111
1333	12049_2011	58	144	43	101	0.298611
1334	12049_2011	59	144	68	76	0.472222
1335	12049_2011	60	144	15	129	0.104167
1336	12049_2011	61	144	7	137	0.0486111
1337	12049_2011	62	144	25	119	0.173611
1338	12049_2011	63	144	9	135	0.0625
1339	12049_2011	64	144	5	139	0.0347222
1340	12049_2011	65	144	20	124	0.138889
1341	12049_2011	66	144	18	126	0.125
1342	12049_2011	67	144	18	126	0.125
1343	12049_2011	68	144	14	130	0.0972222
1344	12049_2011	69	144	13	131	0.0902778
1345	12049_2011	70	144	25	119	0.173611
1346	12049_2011	71	144	13	131	0.0902778
1347	12049_2011	72	144	14	130	0.0972222
1348	12049_2011	73	144	4	140	0.0277778
1349	12049_2011	74	144	21	123	0.145833
1350	12049_2011	75	144	57	87	0.395833
1351	12049_2011	76	144	6	138	0.0416667
1352	12049_2011	77	144	10	134	0.0694444
1353	12049_2011	78	144	7	137	0.0486111
1354	12049_2011	79	144	12	132	0.0833333
1355	12049_2011	80	144	12	132	0.0833333
1356	12049_2011	81	144	13	131	0.0902778
1357	12049_2011	82	144	22	122	0.152778
1358	12049_2011	83	144	27	117	0.1875
1359	12049_2011	84	144	4	140	0.0277778
1360	12049_2011	85	144	28	116	0.194444
1361	12049_2011	86	144	9	135	0.0625
1362	12049_2011	87	144	9	135	0.0625
1363	12049_2011	88	144	14	130	0.0972222
1364	12049_2011	89	144	36	108	0.25
1365	12049_2011	90	144	17	127	0.118056
1366	12049_2011	91	144	4	140	0.0277778
1367	12049_2011	92	144	2	142	0.0138889
1368	12049_2011	93	144	24	120	0.166667
1369	12049_2011	94	144	11	133	0.0763889
1370	12049_2011	95	144	19	125	0.131944
1371	12049_2011	96	144	7	137	0.0486111
1372	12049_2011	97	144	2	142	0.0138889
1373	12049_2011	98	144	11	133	0.0763889
1374	12049_2011	99	150	9	141	0.06
1375	12049_2011	100	144	10	134	0.0694444
1376	12049_2011	101	144	27	117	0.1875
1377	12049_2011	102	144	20	124	0.138889
1378	12049_2011	103	144	10	134	0.0694444
1379	12049_2011	104	144	29	115	0.201389
1380	12049_2011	105	144	10	134	0.0694444
1381	12049_2011	106	144	9	135	0.0625
1382	12049_2011	107	144	26	118	0.180556
1383	12049_2011	108	144	25	119	0.173611
1384	12049_2011	109	144	2	142	0.0138889
1385	12049_2011	110	144	24	120	0.166667
1386	12049_2011	111	144	25	119	0.173611
1387	12049_2011	112	144	9	135	0.0625
1388	12049_2011	113	144	7	137	0.0486111
1389	12049_2011	114	144	11	133	0.0763889
1390	12049_2011	115	144	16	128	0.111111
1391	12049_2011	116	144	3	141	0.0208333
1392	12049_2011	117	144	13	131	0.0902778
1393	12049_2011	118	144	24	120	0.166667
1394	12049_2011	119	144	27	117	0.1875
1395	12049_2011	120	144	26	118	0.180556
1396	12049_2011	121	144	26	118	0.180556
1397	12049_2011	122	144	19	125	0.131944
1398	12049_2011	123	144	35	109	0.243056
1399	12049_2011	124	144	24	120	0.166667
1400	12049_2011	125	144	18	126	0.125
1401	12049_2011	126	144	4	140	0.0277778
1402	12049_2011	127	144	7	137	0.0486111
1403	12049_2011	128	144	4	140	0.0277778
1404	12049_2011	129	144	21	123	0.145833
1405	12049_2011	130	144	12	132	0.0833333
1406	12049_2011	131	144	26	118	0.180556
1407	12049_2011	132	144	30	114	0.208333
1408	12049_2011	133	144	25	119	0.173611
1409	12049_2011	134	144	16	128	0.111111
1410	12049_2011	135	144	8	136	0.0555556
1411	12049_2011	136	144	27	117	0.1875
1412	12049_2011	137	144	25	119	0.173611
1413	12049_2011	138	144	35	109	0.243056
1414	12049_2011	139	144	29	115	0.201389
1415	12049_2011	140	144	16	128	0.111111
1416	12049_2011	141	144	25	119	0.173611
1417	12049_2011	142	144	21	123	0.145833
1418	12049_2011	143	144	11	133	0.0763889
1419	12049_2011	144	144	13	131	0.0902778
1420	12049_2011	145	144	17	127	0.118056
1421	12049_2011	146	144	23	121	0.159722
1422	12049_2011	147	144	11	133	0.0763889
1423	12049_2011	148	144	27	117	0.1875
1424	12049_2011	149	144	30	114	0.208333
1425	12049_2011	150	144	21	123	0.145833
1426	12049_2011	151	144	32	112	0.222222
1427	12049_2011	152	144	31	113	0.215278
1428	12049_2011	153	144	18	126	0.125
1429	12049_2011	154	144	22	122	0.152778
1430	12049_2011	155	144	25	119	0.173611
1431	12049_2011	156	144	11	133	0.0763889
1432	12049_2011	157	144	12	132	0.0833333
1433	12049_2011	158	144	18	126	0.125
1434	12049_2011	159	144	16	128	0.111111
1435	12049_2011	160	144	19	125	0.131944
1436	12049_2011	161	144	19	125	0.131944
1437	12049_2011	162	144	19	125	0.131944
1438	12049_2011	163	144	31	113	0.215278
1439	12049_2011	164	144	23	121	0.159722
1440	12049_2011	165	144	11	133	0.0763889
1441	12049_2011	166	144	19	125	0.131944
1442	12049_2011	167	144	15	129	0.104167
1443	12049_2011	168	144	26	118	0.180556
1444	12049_2011	169	144	35	109	0.243056
1445	12049_2011	170	144	18	126	0.125
1446	12049_2011	171	144	29	115	0.201389
1447	12049_2011	172	144	17	127	0.118056
1448	12049_2011	173	144	7	137	0.0486111
1449	12049_2011	174	144	15	129	0.104167
1450	12049_2011	175	144	12	132	0.0833333
1451	12049_2011	176	144	14	130	0.0972222
1452	12049_2011	177	144	16	128	0.111111
1453	12049_2011	178	144	13	131	0.0902778
1454	12049_2011	179	144	33	111	0.229167
1455	12049_2011	180	144	13	131	0.0902778
1456	12049_2011	181	144	15	129	0.104167
1457	12049_2011	182	144	9	135	0.0625
1458	12049_2011	183	144	6	138	0.0416667
1459	12049_2011	184	144	11	133	0.0763889
1460	12049_2011	185	144	13	131	0.0902778
1461	12049_2011	186	144	20	124	0.138889
1462	12049_2011	187	144	26	118	0.180556
1463	12049_2011	188	144	31	113	0.215278
1464	12049_2011	189	144	27	117	0.1875
1465	12049_2011	190	144	13	131	0.0902778
1466	12049_2011	191	144	39	105	0.270833
1467	12049_2011	192	144	29	115	0.201389
1468	12049_2011	193	144	23	121	0.159722
1469	12049_2011	194	144	64	80	0.444444
1470	12049_2011	195	144	29	115	0.201389
1471	12049_2011	196	144	16	128	0.111111
1472	12049_2011	197	144	24	120	0.166667
1473	12049_2011	198	144	27	117	0.1875
1474	12049_2011	199	144	28	116	0.194444
1475	12049_2011	200	144	21	123	0.145833
1476	12049_2011	201	144	22	122	0.152778
1477	12049_2011	202	144	14	130	0.0972222
1478	12049_2011	203	144	21	123	0.145833
1479	12049_2011	204	144	21	123	0.145833
1480	12049_2011	205	144	21	123	0.145833
1481	12049_2011	206	144	27	117	0.1875
1482	12049_2011	207	144	26	118	0.180556
1483	12049_2011	208	144	25	119	0.173611
1484	12049_2011	209	144	25	119	0.173611
1485	12049_2011	210	144	17	127	0.118056
1486	12049_2011	211	144	22	122	0.152778
1487	12049_2011	212	144	48	96	0.333333
1488	12049_2011	213	144	19	125	0.131944
1489	12049_2011	214	144	25	119	0.173611
1490	12049_2011	215	144	21	123	0.145833
1491	12049_2011	216	144	22	122	0.152778
1492	12049_2011	217	144	24	120	0.166667
1493	12049_2011	218	144	37	107	0.256944
1494	12049_2011	219	144	33	111	0.229167
1495	12049_2011	220	144	26	118	0.180556
1496	12049_2011	221	144	4	140	0.0277778
1497	12049_2011	222	144	33	111	0.229167
1498	12049_2011	223	144	32	112	0.222222
1499	12049_2011	224	144	11	133	0.0763889
1500	12049_2011	225	138	10	128	0.0724638
1501	12049_2011	226	144	12	132	0.0833333
1502	12049_2011	227	144	10	134	0.0694444
1503	12049_2011	228	144	18	126	0.125
1504	12049_2011	229	144	12	132	0.0833333
1505	12049_2011	230	144	9	135	0.0625
1506	12049_2011	231	144	10	134	0.0694444
1507	12049_2011	232	144	17	127	0.118056
1508	12049_2011	233	144	10	134	0.0694444
1509	12049_2011	234	144	6	138	0.0416667
1510	12049_2011	235	144	6	138	0.0416667
1511	12049_2011	236	144	0	144	0
1512	12049_2011	237	144	13	131	0.0902778
1513	12049_2011	238	144	29	115	0.201389
1514	12049_2011	239	144	13	131	0.0902778
1515	12049_2011	240	144	67	77	0.465278
1516	12049_2011	241	144	66	78	0.458333
1517	12049_2011	242	144	78	66	0.541667
1518	12049_2011	243	144	66	78	0.458333
1519	12049_2011	244	144	80	64	0.555556
1520	12049_2011	245	144	76	68	0.527778
1521	12049_2011	246	144	75	69	0.520833
1522	12049_2011	247	144	70	74	0.486111
1523	12049_2011	248	144	68	76	0.472222
1524	12049_2011	249	144	78	66	0.541667
1525	12049_2011	250	144	80	64	0.555556
1526	12049_2011	251	144	80	64	0.555556
1527	12049_2011	252	144	75	69	0.520833
1528	12049_2011	253	144	76	68	0.527778
1529	12049_2011	254	144	22	122	0.152778
1530	12049_2011	255	144	20	124	0.138889
1531	12051_2011	1	144	69	75	0.479167
1532	12051_2011	2	144	80	64	0.555556
1533	12051_2011	3	144	80	64	0.555556
1534	12051_2011	4	144	77	67	0.534722
1535	12051_2011	5	144	80	64	0.555556
1536	12051_2011	6	144	97	47	0.673611
1537	12051_2011	7	144	57	87	0.395833
1538	12051_2011	8	144	69	75	0.479167
1539	12051_2011	9	144	78	66	0.541667
1540	12051_2011	10	144	48	96	0.333333
1541	12051_2011	11	144	127	17	0.881944
1542	12051_2011	12	144	58	86	0.402778
1543	12051_2011	13	144	48	96	0.333333
1544	12051_2011	14	144	104	40	0.722222
1545	12051_2011	15	144	79	65	0.548611
1546	12051_2011	16	144	90	54	0.625
1547	12051_2011	17	144	46	98	0.319444
1548	12051_2011	18	144	101	43	0.701389
1549	12051_2011	19	144	117	27	0.8125
1550	12051_2011	20	144	72	72	0.5
1551	12051_2011	21	144	70	74	0.486111
1552	12051_2011	22	144	92	52	0.638889
1553	12051_2011	23	144	100	44	0.694444
1554	12051_2011	24	144	66	78	0.458333
1555	12051_2011	25	144	72	72	0.5
1556	12051_2011	26	144	79	65	0.548611
1557	12051_2011	27	144	40	104	0.277778
1558	12051_2011	28	144	64	80	0.444444
1559	12051_2011	29	144	69	75	0.479167
1560	12051_2011	30	144	127	17	0.881944
1561	12051_2011	31	144	132	12	0.916667
1562	12051_2011	32	144	82	62	0.569444
1563	12051_2011	33	144	65	79	0.451389
1564	12051_2011	34	144	52	92	0.361111
1565	12051_2011	35	144	37	107	0.256944
1566	12051_2011	36	144	25	119	0.173611
1567	12051_2011	37	144	26	118	0.180556
1568	12051_2011	38	144	48	96	0.333333
1569	12051_2011	39	144	43	101	0.298611
1570	12051_2011	40	144	38	106	0.263889
1571	12051_2011	41	144	31	113	0.215278
1572	12051_2011	42	144	21	123	0.145833
1573	12051_2011	43	144	30	114	0.208333
1574	12051_2011	44	144	38	106	0.263889
1575	12051_2011	45	144	31	113	0.215278
1576	12051_2011	46	144	34	110	0.236111
1577	12051_2011	47	144	16	128	0.111111
1578	12051_2011	48	144	17	127	0.118056
1579	12051_2011	49	144	38	106	0.263889
1580	12051_2011	50	144	22	122	0.152778
1581	12051_2011	51	144	8	136	0.0555556
1582	12051_2011	52	144	15	129	0.104167
1583	12051_2011	53	144	25	119	0.173611
1584	12051_2011	54	144	26	118	0.180556
1585	12051_2011	55	144	45	99	0.3125
1586	12051_2011	56	144	51	93	0.354167
1587	12051_2011	57	144	3	141	0.0208333
1588	12051_2011	58	144	16	128	0.111111
1589	12051_2011	59	144	15	129	0.104167
1590	12051_2011	60	144	27	117	0.1875
1591	12051_2011	61	144	32	112	0.222222
1592	12051_2011	62	144	17	127	0.118056
1593	12051_2011	63	144	11	133	0.0763889
1594	12051_2011	64	144	12	132	0.0833333
1595	12051_2011	65	144	26	118	0.180556
1596	12051_2011	66	144	37	107	0.256944
1597	12051_2011	67	144	20	124	0.138889
1598	12051_2011	68	144	20	124	0.138889
1599	12051_2011	69	144	4	140	0.0277778
1600	12051_2011	70	144	7	137	0.0486111
1601	12051_2011	71	144	30	114	0.208333
1602	12051_2011	72	144	29	115	0.201389
1603	12051_2011	73	144	15	129	0.104167
1604	12051_2011	74	144	17	127	0.118056
1605	12051_2011	75	144	15	129	0.104167
1606	12051_2011	76	144	8	136	0.0555556
1607	12051_2011	77	144	19	125	0.131944
1608	12051_2011	78	144	16	128	0.111111
1609	12051_2011	79	144	43	101	0.298611
1610	12051_2011	80	144	11	133	0.0763889
1611	12051_2011	81	144	20	124	0.138889
1612	12051_2011	82	144	11	133	0.0763889
1613	12051_2011	83	144	29	115	0.201389
1614	12051_2011	84	144	16	128	0.111111
1615	12051_2011	85	144	26	118	0.180556
1616	12051_2011	86	144	29	115	0.201389
1617	12051_2011	87	144	17	127	0.118056
1618	12051_2011	88	144	35	109	0.243056
1619	12051_2011	89	144	8	136	0.0555556
1620	12051_2011	90	144	28	116	0.194444
1621	12051_2011	91	144	23	121	0.159722
1622	12051_2011	92	144	17	127	0.118056
1623	12051_2011	93	144	42	102	0.291667
1624	12051_2011	94	144	17	127	0.118056
1625	12051_2011	95	144	30	114	0.208333
1626	12051_2011	96	144	36	108	0.25
1627	12051_2011	97	144	21	123	0.145833
1628	12051_2011	98	144	21	123	0.145833
1629	12051_2011	99	150	5	145	0.0333333
1630	12051_2011	100	144	34	110	0.236111
1631	12051_2011	101	144	32	112	0.222222
1632	12051_2011	102	144	9	135	0.0625
1633	12051_2011	103	144	4	140	0.0277778
1634	12051_2011	104	144	15	129	0.104167
1635	12051_2011	105	144	24	120	0.166667
1636	12051_2011	106	144	20	124	0.138889
1637	12051_2011	107	144	14	130	0.0972222
1638	12051_2011	108	144	8	136	0.0555556
1639	12051_2011	109	144	20	124	0.138889
1640	12051_2011	110	144	14	130	0.0972222
1641	12051_2011	111	144	17	127	0.118056
1642	12051_2011	112	144	16	128	0.111111
1643	12051_2011	113	144	9	135	0.0625
1644	12051_2011	114	144	10	134	0.0694444
1645	12051_2011	115	144	28	116	0.194444
1646	12051_2011	116	144	22	122	0.152778
1647	12051_2011	117	144	6	138	0.0416667
1648	12051_2011	118	144	17	127	0.118056
1649	12051_2011	119	144	12	132	0.0833333
1650	12051_2011	120	144	28	116	0.194444
1651	12051_2011	121	144	4	140	0.0277778
1652	12051_2011	122	144	17	127	0.118056
1653	12051_2011	123	144	8	136	0.0555556
1654	12051_2011	124	144	7	137	0.0486111
1655	12051_2011	125	144	17	127	0.118056
1656	12051_2011	126	144	31	113	0.215278
1657	12051_2011	127	144	25	119	0.173611
1658	12051_2011	128	144	13	131	0.0902778
1659	12051_2011	129	144	14	130	0.0972222
1660	12051_2011	130	144	21	123	0.145833
1661	12051_2011	131	144	17	127	0.118056
1662	12051_2011	132	144	16	128	0.111111
1663	12051_2011	133	144	27	117	0.1875
1664	12051_2011	134	144	20	124	0.138889
1665	12051_2011	135	144	8	136	0.0555556
1666	12051_2011	136	144	14	130	0.0972222
1667	12051_2011	137	144	17	127	0.118056
1668	12051_2011	138	144	9	135	0.0625
1669	12051_2011	139	144	21	123	0.145833
1670	12051_2011	140	144	14	130	0.0972222
1671	12051_2011	141	144	25	119	0.173611
1672	12051_2011	142	144	11	133	0.0763889
1673	12051_2011	143	144	27	117	0.1875
1674	12051_2011	144	144	20	124	0.138889
1675	12051_2011	145	144	25	119	0.173611
1676	12051_2011	146	144	27	117	0.1875
1677	12051_2011	147	144	5	139	0.0347222
1678	12051_2011	148	144	19	125	0.131944
1679	12051_2011	149	144	18	126	0.125
1680	12051_2011	150	144	24	120	0.166667
1681	12051_2011	151	144	25	119	0.173611
1682	12051_2011	152	144	27	117	0.1875
1683	12051_2011	153	144	29	115	0.201389
1684	12051_2011	154	144	11	133	0.0763889
1685	12051_2011	155	144	9	135	0.0625
1686	12051_2011	156	144	18	126	0.125
1687	12051_2011	157	144	15	129	0.104167
1688	12051_2011	158	144	27	117	0.1875
1689	12051_2011	159	144	20	124	0.138889
1690	12051_2011	160	144	24	120	0.166667
1691	12051_2011	161	144	14	130	0.0972222
1692	12051_2011	162	144	19	125	0.131944
1693	12051_2011	163	144	15	129	0.104167
1694	12051_2011	164	144	24	120	0.166667
1695	12051_2011	165	144	28	116	0.194444
1696	12051_2011	166	144	11	133	0.0763889
1697	12051_2011	167	144	23	121	0.159722
1698	12051_2011	168	144	13	131	0.0902778
1699	12051_2011	169	144	28	116	0.194444
1700	12051_2011	170	144	22	122	0.152778
1701	12051_2011	171	144	21	123	0.145833
1702	12051_2011	172	144	21	123	0.145833
1703	12051_2011	173	144	16	128	0.111111
1704	12051_2011	174	144	14	130	0.0972222
1705	12051_2011	175	144	14	130	0.0972222
1706	12051_2011	176	144	11	133	0.0763889
1707	12051_2011	177	144	37	107	0.256944
1708	12051_2011	178	144	18	126	0.125
1709	12051_2011	179	144	15	129	0.104167
1710	12051_2011	180	144	10	134	0.0694444
1711	12051_2011	181	144	27	117	0.1875
1712	12051_2011	182	144	42	102	0.291667
1713	12051_2011	183	144	22	122	0.152778
1714	12051_2011	184	144	8	136	0.0555556
1715	12051_2011	185	144	10	134	0.0694444
1716	12051_2011	186	144	12	132	0.0833333
1717	12051_2011	187	144	6	138	0.0416667
1718	12051_2011	188	144	13	131	0.0902778
1719	12051_2011	189	144	9	135	0.0625
1720	12051_2011	190	144	4	140	0.0277778
1721	12051_2011	191	144	23	121	0.159722
1722	12051_2011	192	144	34	110	0.236111
1723	12051_2011	193	144	24	120	0.166667
1724	12051_2011	194	144	44	100	0.305556
1725	12051_2011	195	144	35	109	0.243056
1726	12051_2011	196	144	13	131	0.0902778
1727	12051_2011	197	144	19	125	0.131944
1728	12051_2011	198	144	35	109	0.243056
1729	12051_2011	199	144	19	125	0.131944
1730	12051_2011	200	144	30	114	0.208333
1731	12051_2011	201	144	15	129	0.104167
1732	12051_2011	202	144	22	122	0.152778
1733	12051_2011	203	144	34	110	0.236111
1734	12051_2011	204	144	14	130	0.0972222
1735	12051_2011	205	144	18	126	0.125
1736	12051_2011	206	144	13	131	0.0902778
1737	12051_2011	207	144	25	119	0.173611
1738	12051_2011	208	144	33	111	0.229167
1739	12051_2011	209	144	17	127	0.118056
1740	12051_2011	210	144	12	132	0.0833333
1741	12051_2011	211	144	26	118	0.180556
1742	12051_2011	212	144	10	134	0.0694444
1743	12051_2011	213	144	13	131	0.0902778
1744	12051_2011	214	144	11	133	0.0763889
1745	12051_2011	215	144	2	142	0.0138889
1746	12051_2011	216	144	23	121	0.159722
1747	12051_2011	217	144	25	119	0.173611
1748	12051_2011	218	144	31	113	0.215278
1749	12051_2011	219	144	16	128	0.111111
1750	12051_2011	220	144	40	104	0.277778
1751	12051_2011	221	144	40	104	0.277778
1752	12051_2011	222	144	21	123	0.145833
1753	12051_2011	223	144	18	126	0.125
1754	12051_2011	224	144	33	111	0.229167
1755	12051_2011	225	138	25	113	0.181159
1756	12051_2011	226	144	29	115	0.201389
1757	12051_2011	227	144	24	120	0.166667
1758	12051_2011	228	144	35	109	0.243056
1759	12051_2011	229	144	4	140	0.0277778
1760	12051_2011	230	144	17	127	0.118056
1761	12051_2011	231	144	9	135	0.0625
1762	12051_2011	232	144	21	123	0.145833
1763	12051_2011	233	144	36	108	0.25
1764	12051_2011	234	144	17	127	0.118056
1765	12051_2011	235	144	41	103	0.284722
1766	12051_2011	236	144	29	115	0.201389
1767	12051_2011	237	144	56	88	0.388889
1768	12051_2011	238	144	51	93	0.354167
1769	12051_2011	239	144	20	124	0.138889
1770	12051_2011	240	144	11	133	0.0763889
1771	12051_2011	241	144	55	89	0.381944
1772	12051_2011	242	144	56	88	0.388889
1773	12051_2011	243	144	58	86	0.402778
1774	12051_2011	244	144	82	62	0.569444
1775	12051_2011	245	144	76	68	0.527778
1776	12051_2011	246	144	70	74	0.486111
1777	12051_2011	247	144	73	71	0.506944
1778	12051_2011	248	144	73	71	0.506944
1779	12051_2011	249	144	81	63	0.5625
1780	12051_2011	250	144	74	70	0.513889
1781	12051_2011	251	144	80	64	0.555556
1782	12051_2011	252	144	39	105	0.270833
1783	12051_2011	253	144	70	74	0.486111
1784	12051_2011	254	144	27	117	0.1875
1785	12051_2011	255	144	28	116	0.194444
1786	12052_2011	1	144	92	52	0.638889
1787	12052_2011	2	144	97	47	0.673611
1788	12052_2011	3	144	116	28	0.805556
1789	12052_2011	4	144	85	59	0.590278
1790	12052_2011	5	144	127	17	0.881944
1791	12052_2011	6	144	113	31	0.784722
1792	12052_2011	7	144	69	75	0.479167
1793	12052_2011	8	144	102	42	0.708333
1794	12052_2011	9	144	81	63	0.5625
1795	12052_2011	10	144	120	24	0.833333
1796	12052_2011	11	144	101	43	0.701389
1797	12052_2011	12	144	66	78	0.458333
1798	12052_2011	13	144	58	86	0.402778
1799	12052_2011	14	144	110	34	0.763889
1800	12052_2011	15	144	94	50	0.652778
1801	12052_2011	16	144	64	80	0.444444
1802	12052_2011	17	144	61	83	0.423611
1803	12052_2011	18	144	85	59	0.590278
1804	12052_2011	19	144	72	72	0.5
1805	12052_2011	20	144	59	85	0.409722
1806	12052_2011	21	144	82	62	0.569444
1807	12052_2011	22	144	86	58	0.597222
1808	12052_2011	23	144	95	49	0.659722
1809	12052_2011	24	144	78	66	0.541667
1810	12052_2011	25	144	79	65	0.548611
1811	12052_2011	26	144	81	63	0.5625
1812	12052_2011	27	144	78	66	0.541667
1813	12052_2011	28	144	74	70	0.513889
1814	12052_2011	29	144	71	73	0.493056
1815	12052_2011	30	144	85	59	0.590278
1816	12052_2011	31	144	89	55	0.618056
1817	12052_2011	32	144	55	89	0.381944
1818	12052_2011	33	144	68	76	0.472222
1819	12052_2011	34	144	59	85	0.409722
1820	12052_2011	35	144	32	112	0.222222
1821	12052_2011	36	144	65	79	0.451389
1822	12052_2011	37	144	43	101	0.298611
1823	12052_2011	38	144	15	129	0.104167
1824	12052_2011	39	144	47	97	0.326389
1825	12052_2011	40	144	50	94	0.347222
1826	12052_2011	41	144	58	86	0.402778
1827	12052_2011	42	144	64	80	0.444444
1828	12052_2011	43	144	42	102	0.291667
1829	12052_2011	44	144	32	112	0.222222
1830	12052_2011	45	144	58	86	0.402778
1831	12052_2011	46	144	46	98	0.319444
1832	12052_2011	47	144	47	97	0.326389
1833	12052_2011	48	144	61	83	0.423611
1834	12052_2011	49	144	40	104	0.277778
1835	12052_2011	50	144	36	108	0.25
1836	12052_2011	51	144	35	109	0.243056
1837	12052_2011	52	144	18	126	0.125
1838	12052_2011	53	144	17	127	0.118056
1839	12052_2011	54	144	35	109	0.243056
1840	12052_2011	55	144	42	102	0.291667
1841	12052_2011	56	144	58	86	0.402778
1842	12052_2011	57	144	36	108	0.25
1843	12052_2011	58	144	52	92	0.361111
1844	12052_2011	59	144	24	120	0.166667
1845	12052_2011	60	144	44	100	0.305556
1846	12052_2011	61	144	19	125	0.131944
1847	12052_2011	62	144	1	143	0.00694444
1848	12052_2011	63	144	52	92	0.361111
1849	12052_2011	64	144	11	133	0.0763889
1850	12052_2011	65	144	32	112	0.222222
1851	12052_2011	66	144	80	64	0.555556
1852	12052_2011	67	144	67	77	0.465278
1853	12052_2011	68	144	21	123	0.145833
1854	12052_2011	69	144	68	76	0.472222
1855	12052_2011	70	144	36	108	0.25
1856	12052_2011	71	144	46	98	0.319444
1857	12052_2011	72	144	65	79	0.451389
1858	12052_2011	73	144	23	121	0.159722
1859	12052_2011	74	144	96	48	0.666667
1860	12052_2011	75	144	57	87	0.395833
1861	12052_2011	76	144	35	109	0.243056
1862	12052_2011	77	144	64	80	0.444444
1863	12052_2011	78	144	11	133	0.0763889
1864	12052_2011	79	144	13	131	0.0902778
1865	12052_2011	80	144	29	115	0.201389
1866	12052_2011	81	144	30	114	0.208333
1867	12052_2011	82	144	31	113	0.215278
1868	12052_2011	83	144	11	133	0.0763889
1869	12052_2011	84	144	12	132	0.0833333
1870	12052_2011	85	144	8	136	0.0555556
1871	12052_2011	86	144	6	138	0.0416667
1872	12052_2011	87	144	16	128	0.111111
1873	12052_2011	88	144	34	110	0.236111
1874	12052_2011	89	144	14	130	0.0972222
1875	12052_2011	90	144	9	135	0.0625
1876	12052_2011	91	144	18	126	0.125
1877	12052_2011	92	144	2	142	0.0138889
1878	12052_2011	93	144	13	131	0.0902778
1879	12052_2011	94	144	26	118	0.180556
1880	12052_2011	95	144	8	136	0.0555556
1881	12052_2011	96	144	25	119	0.173611
1882	12052_2011	97	144	102	42	0.708333
1883	12052_2011	98	144	27	117	0.1875
1884	12052_2011	99	150	65	85	0.433333
1885	12052_2011	100	144	2	142	0.0138889
1886	12052_2011	101	144	28	116	0.194444
1887	12052_2011	102	144	9	135	0.0625
1888	12052_2011	103	144	8	136	0.0555556
1889	12052_2011	104	144	21	123	0.145833
1890	12052_2011	105	144	45	99	0.3125
1891	12052_2011	106	144	25	119	0.173611
1892	12052_2011	107	144	11	133	0.0763889
1893	12052_2011	108	144	49	95	0.340278
1894	12052_2011	109	144	39	105	0.270833
1895	12052_2011	110	144	10	134	0.0694444
1896	12052_2011	111	144	26	118	0.180556
1897	12052_2011	112	144	26	118	0.180556
1898	12052_2011	113	144	14	130	0.0972222
1899	12052_2011	114	144	22	122	0.152778
1900	12052_2011	115	144	16	128	0.111111
1901	12052_2011	116	144	36	108	0.25
1902	12052_2011	117	144	24	120	0.166667
1903	12052_2011	118	144	5	139	0.0347222
1904	12052_2011	119	144	16	128	0.111111
1905	12052_2011	120	144	31	113	0.215278
1906	12052_2011	121	144	19	125	0.131944
1907	12052_2011	122	144	41	103	0.284722
1908	12052_2011	123	144	28	116	0.194444
1909	12052_2011	124	144	42	102	0.291667
1910	12052_2011	125	144	70	74	0.486111
1911	12052_2011	126	144	67	77	0.465278
1912	12052_2011	127	144	60	84	0.416667
1913	12052_2011	128	144	80	64	0.555556
1914	12052_2011	129	144	49	95	0.340278
1915	12052_2011	130	144	16	128	0.111111
1916	12052_2011	131	144	46	98	0.319444
1917	12052_2011	132	144	66	78	0.458333
1918	12052_2011	133	144	19	125	0.131944
1919	12052_2011	134	144	25	119	0.173611
1920	12052_2011	135	144	15	129	0.104167
1921	12052_2011	136	144	18	126	0.125
1922	12052_2011	137	144	18	126	0.125
1923	12052_2011	138	144	21	123	0.145833
1924	12052_2011	139	144	16	128	0.111111
1925	12052_2011	140	144	11	133	0.0763889
1926	12052_2011	141	144	14	130	0.0972222
1927	12052_2011	142	144	31	113	0.215278
1928	12052_2011	143	144	12	132	0.0833333
1929	12052_2011	144	144	20	124	0.138889
1930	12052_2011	145	144	20	124	0.138889
1931	12052_2011	146	144	8	136	0.0555556
1932	12052_2011	147	144	13	131	0.0902778
1933	12052_2011	148	144	23	121	0.159722
1934	12052_2011	149	144	19	125	0.131944
1935	12052_2011	150	144	15	129	0.104167
1936	12052_2011	151	144	15	129	0.104167
1937	12052_2011	152	144	22	122	0.152778
1938	12052_2011	153	144	17	127	0.118056
1939	12052_2011	154	144	24	120	0.166667
1940	12052_2011	155	144	15	129	0.104167
1941	12052_2011	156	144	15	129	0.104167
1942	12052_2011	157	144	27	117	0.1875
1943	12052_2011	158	144	28	116	0.194444
1944	12052_2011	159	144	18	126	0.125
1945	12052_2011	160	144	12	132	0.0833333
1946	12052_2011	161	144	11	133	0.0763889
1947	12052_2011	162	144	29	115	0.201389
1948	12052_2011	163	144	22	122	0.152778
1949	12052_2011	164	144	27	117	0.1875
1950	12052_2011	165	144	18	126	0.125
1951	12052_2011	166	144	27	117	0.1875
1952	12052_2011	167	144	2	142	0.0138889
1953	12052_2011	168	144	9	135	0.0625
1954	12052_2011	169	144	31	113	0.215278
1955	12052_2011	170	144	35	109	0.243056
1956	12052_2011	171	144	22	122	0.152778
1957	12052_2011	172	144	34	110	0.236111
1958	12052_2011	173	144	38	106	0.263889
1959	12052_2011	174	144	90	54	0.625
1960	12052_2011	175	144	60	84	0.416667
1961	12052_2011	176	144	37	107	0.256944
1962	12052_2011	177	144	18	126	0.125
1963	12052_2011	178	144	13	131	0.0902778
1964	12052_2011	179	144	32	112	0.222222
1965	12052_2011	180	144	32	112	0.222222
1966	12052_2011	181	144	35	109	0.243056
1967	12052_2011	182	144	10	134	0.0694444
1968	12052_2011	183	144	17	127	0.118056
1969	12052_2011	184	144	17	127	0.118056
1970	12052_2011	185	144	17	127	0.118056
1971	12052_2011	186	144	29	115	0.201389
1972	12052_2011	187	144	26	118	0.180556
1973	12052_2011	188	144	27	117	0.1875
1974	12052_2011	189	144	34	110	0.236111
1975	12052_2011	190	144	26	118	0.180556
1976	12052_2011	191	144	17	127	0.118056
1977	12052_2011	192	144	26	118	0.180556
1978	12052_2011	193	144	23	121	0.159722
1979	12052_2011	194	144	30	114	0.208333
1980	12052_2011	195	144	24	120	0.166667
1981	12052_2011	196	144	31	113	0.215278
1982	12052_2011	197	144	28	116	0.194444
1983	12052_2011	198	144	17	127	0.118056
1984	12052_2011	199	144	19	125	0.131944
1985	12052_2011	200	144	40	104	0.277778
1986	12052_2011	201	144	35	109	0.243056
1987	12052_2011	202	144	47	97	0.326389
1988	12052_2011	203	144	45	99	0.3125
1989	12052_2011	204	144	19	125	0.131944
1990	12052_2011	205	144	13	131	0.0902778
1991	12052_2011	206	144	25	119	0.173611
1992	12052_2011	207	144	20	124	0.138889
1993	12052_2011	208	144	16	128	0.111111
1994	12052_2011	209	144	13	131	0.0902778
1995	12052_2011	210	144	34	110	0.236111
1996	12052_2011	211	144	12	132	0.0833333
1997	12052_2011	212	144	18	126	0.125
1998	12052_2011	213	144	9	135	0.0625
1999	12052_2011	214	144	20	124	0.138889
[truncated: 9,476 more rows]
